# Supplementary material for: Detection of Mycobacterium tuberculosis Peptides in the Exosomes of Patients with Active and Latent M. tuberculosis Infection Using MRM-MS
Source: PubMed Central journal article supplement (PMC4117584; doi:10.1371/journal.pone.0103811), 2014-07-31

**Supplementary Figure 1:**

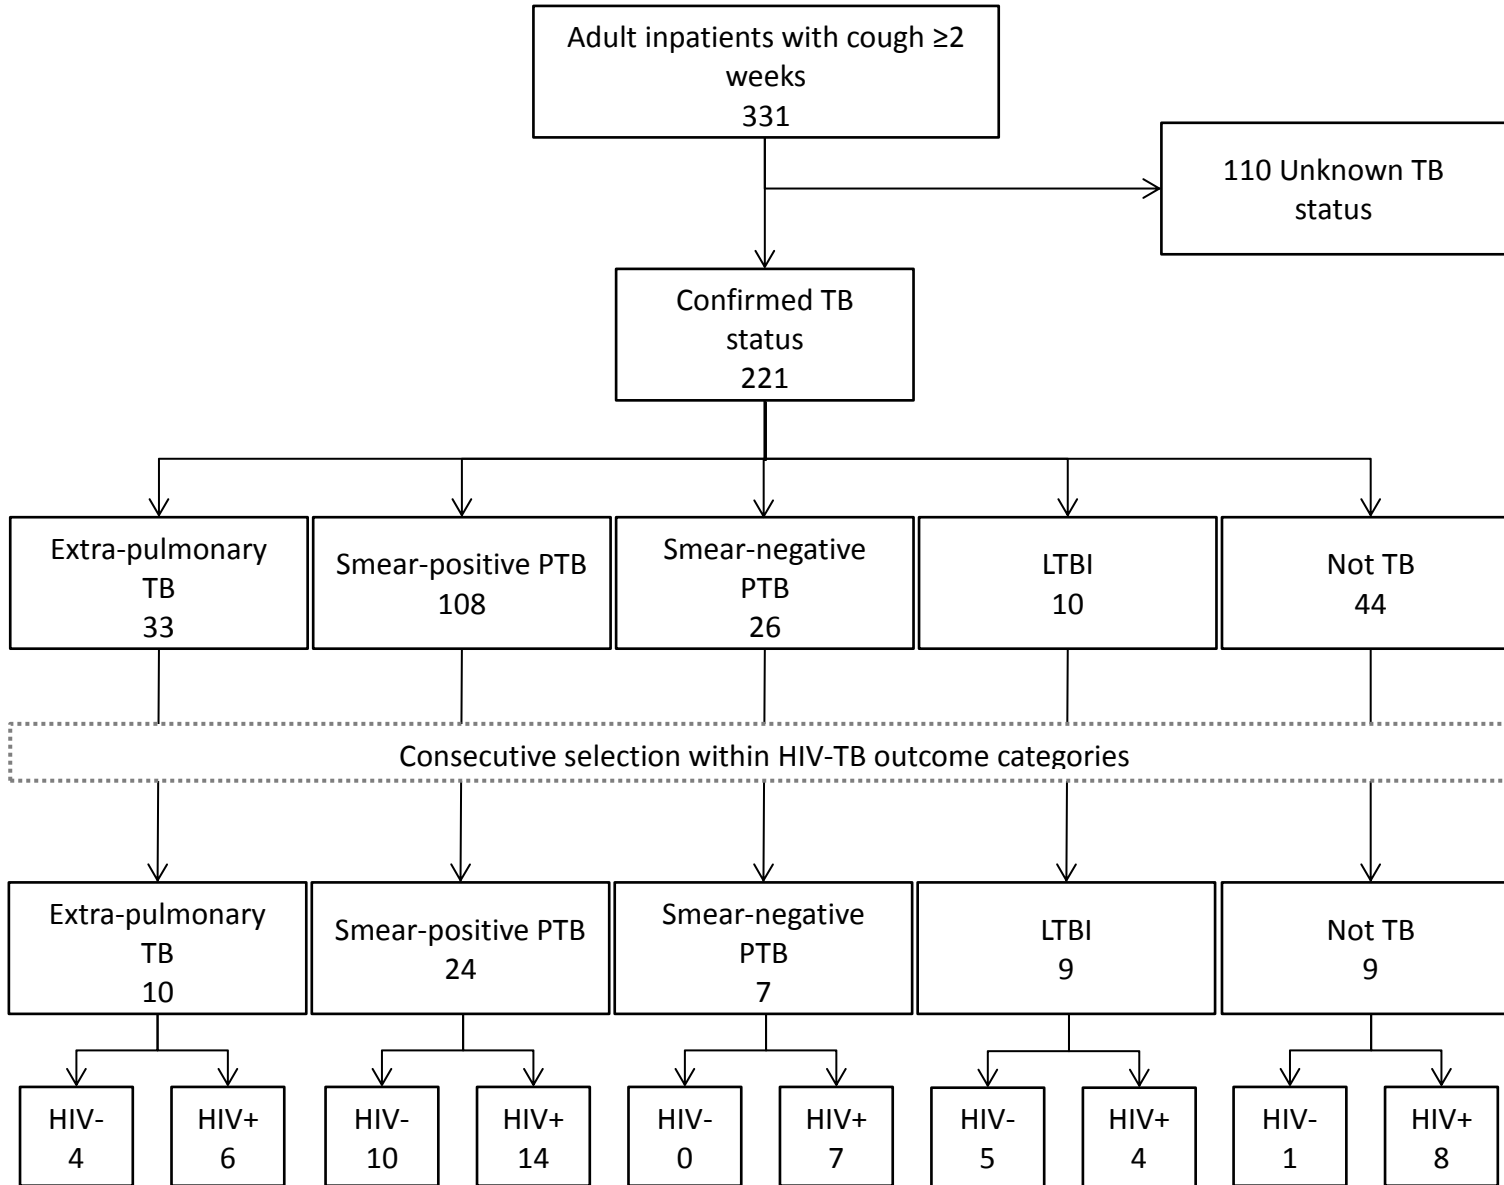

Supplement: pone.0103811.s001.pdf [file pone.0103811.s001.pdf]
