# Supplementary material for: Detection of Mycobacterium tuberculosis Peptides in the Exosomes of Patients with Active and Latent M. tuberculosis Infection Using MRM-MS
Source: PubMed Central journal article supplement (PMC4117584; doi:10.1371/journal.pone.0103811), 2014-07-31
Supplement: pone.0103811.s002.pdf [file pone.0103811.s002.pdf]

**Supplementary Table 1:**

| <b>Characteristics<br/>N (%)</b>        | <b>EPTB<br/>(n=10)</b> | <b>PTB<br/>(n=31)</b> | <b>LTBI<br/>(n=9)</b> | <b>Not TB<br/>(n=9)</b> |
|-----------------------------------------|------------------------|-----------------------|-----------------------|-------------------------|
| Female sex                              | 4 (40)                 | 19 (61)               | 4 (44)                | 3 (33)                  |
| Median age (IQR), years                 | 34 (26-41)             | 29 (23-35)            | 31 (25-40)            | 35 (21-35)              |
| HIV-positive                            | 6 (60)                 | 21 (68)               | 4 (44)                | 8 (89)                  |
| Median CD4+ count (IQR), cells/ $\mu$ L | 18 (9-39)              | 252 (113-337)         | 32 (17-392)           | 190 (71-240)            |
| Antiretroviral therapy*                 | 3 (14)                 | 0 (0)                 | 3 (75)                | 0 (0)                   |
| CTX prophylaxis†                        | 19 (90)                | 6 (100)               | 4 (100)               | 7 (88)                  |
| Antibiotics for current illness         | 5 (50)                 | 24 (77)               | 4 (44)                | 6 (67)                  |
| Dyspnea                                 | 8 (80)                 | 19 (61)               | 5 (56)                | 5 (56)                  |
| Fever, chills, night sweats             | 10 (100)               | 31 (100)              | 9 (100)               | 9 (100)                 |
| Weight loss (>5 kg)‡                    | 10 (100)               | 20 (65)               | 6 (67)                | 3 (33)                  |
| Cough in past 7 days                    | 8 (80)                 | 30 (97)               | 7 (78)                | 8 (89)                  |
| Smear-positive                          | 1 (10)                 | 24 (77)               | 0 (0)                 | 0 (0)                   |
| Mycobacterial culture-positive          | 3 (30)                 | 31 (100)              | 0 (0)                 | 0 (0)                   |

**Abbreviations:** IQR, Interquartile range; N, number; PTB, Pulmonary tuberculosis; EPTB, Extra-pulmonary tuberculosis; LTBI, Latent tuberculosis infection; TB, Tuberculosis; HIV, Human immunodeficiency virus; CTX, Co-trimoxazole prophylaxis; kg, kilograms  
**Legend:** \* 14 missing values (9 PTB, 1 LTBI, 4 Not TB), † 1 missing value (PTB), ‡ 7 missing values (5 PTB, 1 LTBI, 1 Not TB)
