# Supplementary material for: Detection of Mycobacterium tuberculosis Peptides in the Exosomes of Patients with Active and Latent M. tuberculosis Infection Using MRM-MS
Source: PubMed Central journal article supplement (PMC4117584; doi:10.1371/journal.pone.0103811), 2014-07-31
Supplement: pone.0103811.s003.pdf [file pone.0103811.s003.pdf]

| Gene /Protein Name          | Peptide Sequence (z)                | Retention Time Start (min) | Retention Time End (min) | [M+H]   | Average Mass [m/z] | Transition | Dwell Time (sec) | Cone Voltage (V) | Collision Energy (V) |    |
|-----------------------------|-------------------------------------|----------------------------|--------------------------|---------|--------------------|------------|------------------|------------------|----------------------|----|
| <b><u>Rv0009/PpiA</u></b>   | IALFGNHAPK(3)                       | 6.56                       | 7.56                     | 1067.61 | 356.54             | 452.26     | 0.003            | 35               | 18                   |    |
|                             |                                     |                            |                          |         |                    | 566.30     | 0.003            | 35               | 12                   |    |
|                             |                                     |                            |                          |         |                    | 623.33     | 0.003            | 35               | 17                   |    |
|                             | VIQGFMIQGGDPTGTGR(2)                | 7.5                        | 8.5                      | 1732.87 | 867.44             | 588.31     | 0.006            | 35               | 26                   |    |
|                             |                                     |                            |                          |         |                    | 945.44     | 0.006            | 35               | 30                   |    |
| 1058.52                     |                                     |                            |                          |         |                    | 0.006      | 35               | 26               |                      |    |
| 587.33                      |                                     |                            |                          |         |                    | 0.008      | 35               | 29               |                      |    |
| <b><u>Rv0066c/lcd2</u></b>  | GISNFHSPSDVIVDASMPAMIR(3)           | 7.74                       | 8.74                     | 2344.16 | 782.05             | 876.44     | 0.008            | 35               | 34                   |    |
|                             |                                     |                            |                          |         |                    | 991.47     | 0.008            | 35               | 35                   |    |
|                             |                                     |                            |                          |         |                    | 839.53     | 0.019            | 35               | 27                   |    |
|                             | LPNISASVPQLVAAIK(2)                 | 11.44                      | 13.44                    | 1619.98 | 810.99             | 938.60     | 0.019            | 35               | 30                   |    |
|                             |                                     |                            |                          |         |                    | 1025.64    | 0.019            | 35               | 22                   |    |
| <b><u>Rv0125/PepA</u></b>   | TQDVAVLQLR(2)                       | 7.11                       | 8.11                     | 1141.66 | 571.83             | 628.41     | 0.007            | 35               | 17                   |    |
|                             |                                     |                            |                          |         |                    | 699.45     | 0.007            | 35               | 15                   |    |
|                             |                                     |                            |                          |         |                    | 798.52     | 0.007            | 35               | 19                   |    |
|                             | TQDVAVLQLR(2)                       | 5                          | 6                        | 1141.66 | 571.83             | 628.41     | 0.007            | 35               | 17                   |    |
|                             |                                     |                            |                          |         |                    | 699.45     | 0.007            | 35               | 15                   |    |
| <b><u>Rv0129c/Ag85c</u></b> | FLEGLTLR(2)                         | 8.4                        | 9.04                     | 949.56  | 474.78             | 798.52     | 0.007            | 35               | 19                   |    |
|                             |                                     |                            |                          |         |                    | 502.33     | 0.008            | 35               | 12                   |    |
|                             |                                     |                            |                          |         |                    | 559.36     | 0.008            | 35               | 18                   |    |
|                             | VQFQGGGPHAVYLLDGLR(3)               | 8.5                        | 10.5                     | 1927.03 | 643.01             | 688.40     | 0.008            | 35               | 16                   |    |
|                             |                                     |                            |                          |         |                    | 686.42     | 0.008            | 35               | 25                   |    |
| <b><u>Rv0350/DnaK</u></b>   | TTPSIVAFAR(2)                       | 7.7                        | 8.7                      | 1061.60 | 531.80             | 849.48     | 0.008            | 35               | 24                   |    |
|                             |                                     |                            |                          |         |                    | 948.55     | 0.008            | 35               | 24                   |    |
|                             |                                     |                            |                          |         |                    | 563.33     | 0.007            | 35               | 17                   |    |
|                             | ITQDLLDR(2)                         | 6.03                       | 7.03                     | 972.54  | 487.27             | 860.50     | 0.007            | 35               | 17                   |    |
|                             |                                     |                            |                          |         |                    | 516.31     | 0.003            | 35               | 13                   |    |
| <b><u>Rv0363c/Fba</u></b>   | LYTSPEDFEK(2)                       | 5.58                       | 6.58                     | 1227.58 | 614.79             | 631.34     | 0.003            | 35               | 18                   |    |
|                             |                                     |                            |                          |         |                    | 759.40     | 0.003            | 35               | 16                   |    |
|                             |                                     |                            |                          |         |                    | 667.29     | 0.003            | 35               | 16                   |    |
|                             | SEIEEALR(2)                         | 5.99                       | 6.89                     | 945.49  | 473.75             | 764.35     | 0.003            | 35               | 18                   |    |
|                             |                                     |                            |                          |         |                    | 851.38     | 0.003            | 35               | 22                   |    |
| <b><u>Rv0440/GroEL2</u></b> | LRPDILAQQQVAAAK(3)                  | 5.7                        | 6.7                      | 1678.97 | 560.32             | 488.28     | 0.003            | 35               | 22                   |    |
|                             |                                     |                            |                          |         |                    | 617.33     | 0.003            | 35               | 16                   |    |
|                             |                                     |                            |                          |         |                    | 730.41     | 0.003            | 35               | 13                   |    |
|                             | AAVEEGIVAGGGVTLQAAPTLDELK(2)        | 7.74                       | 8.54                     | 2523.78 | 1261.69            | 715.41     | 0.003            | 35               | 22                   |    |
|                             |                                     |                            |                          |         |                    | 772.43     | 0.003            | 35               | 29                   |    |
| <b><u>Rv0931c/PstS1</u></b> | ASFLDQVHFQPLPPAVVK(3)               | 10.5                       | 12.5                     | 1995.15 | 665.04             | 815.45     | 0.006            | 35               | 46                   |    |
|                             |                                     |                            |                          |         |                    | 1311.75    | 0.006            | 35               | 40                   |    |
|                             |                                     |                            |                          |         |                    | 1412.80    | 0.006            | 35               | 40                   |    |
|                             | GLGEAQLNSSGNFLPDQAQSIQAAAAG FASK(3) | 13                         | 15                       | 3090.56 | 1030.85            | 513.34     | 0.03             | 35               | 35                   |    |
|                             |                                     |                            |                          |         |                    | 610.39     | 0.03             | 35               | 34                   |    |
| <b><u>Rv1270c/LprA</u></b>  | SDGSGDTFLFTQYLSK(2)                 | 10                         | 11                       | 1764.84 | 883.42             | 820.53     | 0.03             | 35               | 40                   |    |
|                             |                                     |                            |                          |         |                    | 1034.56    | 0.019            | 35               | 38                   |    |
|                             |                                     |                            |                          |         |                    | 1121.59    | 0.019            | 35               | 37                   |    |
|                             | ITGNSSADDIATLAGSR(2)                | 6.47                       | 7.47                     | 1647.82 | 824.91             | 1249.65    | 0.019            | 35               | 44                   |    |
|                             |                                     |                            |                          |         |                    | 886.47     | 0.03             | 35               | 28                   |    |
| <b><u>Rv1469/CtpD</u></b>   | VVAASELVVGDR(2)                     | 6.66                       | 7.66                     | 1213.68 | 607.84             | 999.55     | 0.03             | 35               | 34                   |    |
|                             |                                     |                            |                          |         |                    | 1146.62    | 0.03             | 35               | 24                   |    |
|                             |                                     |                            |                          |         |                    | 903.49     | 0.003            | 35               | 23                   |    |
|                             | LVFLTGPK(2)                         | 7.52                       | 8.52                     | 873.55  | 437.77             | 1018.52    | 0.003            | 35               | 33                   |    |
|                             |                                     |                            |                          |         |                    | 1089.55    | 0.003            | 35               | 32                   |    |
| <b><u>Rv1827/GarA</u></b>   | HPDSDIFLDDVTVSR(3)                  | 7.44                       | 8.44                     | 1715.84 | 572.61             | 658.39     | 0.006            | 35               | 21                   |    |
|                             |                                     |                            |                          |         |                    | 787.43     | 0.006            | 35               | 17                   |    |
|                             |                                     |                            |                          |         |                    | 874.46     | 0.006            | 35               | 16                   |    |
|                             | ATIEQLLTIPLAK(2)                    | 13.5                       | 15.5                     | 1411.86 | 705.93             | 515.32     | 0.007            | 35               | 13                   |    |
|                             |                                     |                            |                          |         |                    | 662.39     | 0.007            | 35               | 16                   |    |
| <b><u>Rv1837c/GlcB</u></b>  | NYTAPGGGQFTLPGR(2)                  | 5.89                       | 6.89                     | 1535.67 | 768.84             | 761.46     | 0.007            | 35               | 11                   |    |
|                             |                                     |                            |                          |         |                    | 676.36     | 0.006            | 35               | 21                   |    |
|                             |                                     |                            |                          |         |                    | 791.39     | 0.006            | 35               | 22                   |    |
|                             |                                     |                            |                          |         |                    |            | 904.47           | 0.006            | 35                   | 27 |
|                             |                                     |                            |                          |         |                    |            | 428.29           | 0.063            | 35                   | 21 |
|                             |                                     |                            |                          |         |                    | 755.50     | 0.063            | 35               | 21                   |    |
|                             |                                     |                            |                          |         |                    | 868.59     | 0.063            | 35               | 29                   |    |
|                             |                                     |                            |                          |         |                    | 329.19     | 0.003            | 35               | 24                   |    |
|                             |                                     |                            |                          |         |                    | 932.49     | 0.003            | 35               | 26                   |    |
|                             |                                     |                            |                          |         |                    | 1086.57    | 0.003            | 35               | 26                   |    |

| Gene /Protein Name          | Peptide Sequence (z)       | Retention Time Start (min) | Retention Time End (min) | [M+H]   | Average Mass [m/z] | Transition | Dwell Time (sec) | Cone Voltage (V) | Collision Energy (V) |    |
|-----------------------------|----------------------------|----------------------------|--------------------------|---------|--------------------|------------|------------------|------------------|----------------------|----|
| <b><u>Rv1837c/GlcB</u></b>  | VVFINTGFLDR(2)             | 9.5                        | 11.5                     | 1279.71 | 640.85             | 708.37     | 0.019            | 35               | 19                   |    |
|                             |                            |                            |                          |         |                    | 822.41     | 0.019            | 35               | 18                   |    |
|                             |                            |                            |                          |         |                    | 935.49     | 0.019            | 35               | 23                   |    |
|                             | FALNAANAR(2)               | 5.91                       | 6.91                     | 946.51  | 474.26             | 502.27     | 0.003            | 35               | 21                   |    |
|                             |                            |                            |                          |         |                    | 616.32     | 0.003            | 35               | 17                   |    |
|                             |                            |                            |                          |         |                    | 729.40     | 0.003            | 35               | 12                   |    |
|                             |                            |                            |                          |         |                    | 1248.63    | 0.003            | 35               | 36                   |    |
| <b><u>Rv1860/Apa</u></b>    | TTGDPPFPQPPPVANDTR(2)      | 6.57                       | 7.57                     | 1962.96 | 982.48             | 869.45     | 0.003            | 35               | 32                   |    |
|                             |                            |                            |                          |         |                    | 966.50     | 0.003            | 35               | 32                   |    |
| <b><u>Rv1886c/Ag85b</u></b> | PGLPVEYLQVSPSMGR(3)        | 9                          | 11                       | 1826.96 | 609.65             | 547.27     | 0.03             | 35               | 25                   |    |
|                             |                            |                            |                          |         |                    | 731.35     | 0.03             | 35               | 21                   |    |
|                             |                            |                            |                          |         |                    | 830.42     | 0.03             | 35               | 29                   |    |
|                             | WETFLTSELPQWLSANR(2)       | 15.95                      | 16.95                    | 2077.04 | 1039.52            | 971.51     | 0.063            | 35               | 34                   |    |
|                             |                            |                            |                          |         |                    | 1084.59    | 0.063            | 35               | 34                   |    |
|                             |                            |                            |                          |         |                    | 1300.66    | 0.063            | 35               | 34                   |    |
|                             | NDPTQQIPK(2)               | 5.4                        | 6.5                      | 1039.54 | 520.77             | 613.37     | 0.005            | 35               | 18                   |    |
|                             |                            |                            |                          |         |                    | 714.41     | 0.005            | 35               | 18                   |    |
|                             | <b><u>Rv1908c/KatG</u></b> | EATWLGDER(2)               | 6.41                     | 7.41    | 1076.51            | 538.75     | 811.47           | 0.005            | 35                   | 18 |
|                             |                            |                            |                          |         |                    |            | 589.29           | 0.003            | 35                   | 16 |
| FAPLNSWPDNASLKD(2)          |                            | 8.06                       | 9.06                     | 1674.82 | 837.91             | 775.37     | 0.003            | 35               | 19                   |    |
|                             |                            |                            |                          |         |                    | 876.42     | 0.003            | 35               | 15                   |    |
|                             |                            |                            |                          |         |                    | 859.42     | 0.008            | 35               | 25                   |    |
| TFGFGFGR(2)                 |                            | 8.09                       | 10.09                    | 887.44  | 444.72             | 1045.49    | 0.008            | 35               | 28                   |    |
|                             |                            |                            |                          |         |                    | 1132.53    | 0.008            | 35               | 26                   |    |
| <b><u>Rv1926c/Mpt63</u></b> | GSVTPAVSQFNAR(2)           | 6                          | 7                        | 1332.93 | 667.47             | 583.30     | 0.011            | 35               | 17                   |    |
|                             |                            |                            |                          |         |                    | 640.32     | 0.011            | 35               | 15                   |    |
|                             | TADGINYR(2)                | 5.2                        | 6.2                      | 908.45  | 455.22             | 787.39     | 0.011            | 35               | 15                   |    |
|                             |                            |                            |                          |         |                    | 722.36     | 0.003            | 35               | 23                   |    |
|                             |                            |                            |                          |         |                    | 821.43     | 0.003            | 35               | 26                   |    |
| <b><u>Rv1932/Tpx</u></b>    | DSFGEDYGVTIADGPMAGLLAR(2)  | 7.96                       | 8.96                     | 2254.07 | 1128.04            | 989.52     | 0.003            | 35               | 23                   |    |
|                             |                            |                            |                          |         |                    | 565.31     | 0.003            | 35               | 14                   |    |
|                             |                            |                            |                          |         |                    | 622.33     | 0.003            | 35               | 18                   |    |
| <b><u>Rv1980c/Mpt64</u></b> | GTQAVVLK(2)                | 5.5                        | 6.5                      | 815.06  | 408.53             | 737.36     | 0.003            | 35               | 14                   |    |
|                             |                            |                            |                          |         |                    | 828.48     | 0.011            | 35               | 35                   |    |
|                             | VYQNAGGTHPTTTYK(3)         | 5.05                       | 5.85                     | 1637.81 | 546.60             | 1184.65    | 0.011            | 35               | 36                   |    |
|                             |                            |                            |                          |         |                    | 1285.69    | 0.011            | 35               | 38                   |    |
|                             |                            |                            |                          |         |                    | 458.33     | 0.003            | 35               | 20                   |    |
|                             | FLSAATSSTPR(2)             | 5.65                       | 6.55                     | 1136.80 | 569.40             | 529.37     | 0.003            | 35               | 10                   |    |
|                             |                            |                            |                          |         |                    | 657.43     | 0.003            | 35               | 12                   |    |
| AFDWDQAYR(2)                | 7.08                       | 8.08                       | 1170.52                  | 586.26  | 613.32             | 0.005      | 35               | 24               |                      |    |
|                             |                            |                            |                          |         | 710.37             | 0.005      | 35               | 23               |                      |    |
|                             |                            |                            |                          |         | 847.43             | 0.005      | 35               | 20               |                      |    |
| SLENYIAQTR(2)               | 6.56                       | 7.56                       | 1193.62                  | 597.81  | 648.33             | 0.003      | 35               | 23               |                      |    |
|                             |                            |                            |                          |         | 719.37             | 0.003      | 35               | 20               |                      |    |
|                             |                            |                            |                          |         | 790.41             | 0.003      | 35               | 16               |                      |    |
| EAPYELNITSATYQSAIPPR(2)     | 7.97                       | 8.97                       | 2220.12                  | 1111.06 | 652.30             | 0.006      | 35               | 21               |                      |    |
|                             |                            |                            |                          |         | 838.38             | 0.006      | 35               | 17               |                      |    |
|                             |                            |                            |                          |         | 953.41             | 0.006      | 35               | 16               |                      |    |
|                             |                            |                            |                          |         | 751.41             | 0.006      | 35               | 17               |                      |    |
| <b><u>Rv2031c/HspX</u></b>  | AELPGVDPDK(2)              | 5.95                       | 7.5                      | 1141.53 | 520.77             | 865.45     | 0.006            | 35               | 18                   |    |
|                             |                            |                            |                          |         |                    | 994.50     | 0.006            | 35               | 19                   |    |
|                             | DGQLTIK(2)                 | 5.64                       | 6.44                     | 773.44  | 387.72             | 1190.62    | 0.011            | 35               | 33                   |    |
|                             |                            |                            |                          |         |                    | 1291.66    | 0.011            | 35               | 41                   |    |
|                             |                            |                            |                          |         |                    | 1404.75    | 0.011            | 35               | 41                   |    |
| TVSLPVGAEDEDDIK(2)          | 6.85                       | 7.75                       | 1457.74                  | 729.87  | 359.19             | 0.003      | 35               | 18               |                      |    |
|                             |                            |                            |                          |         | 630.31             | 0.003      | 35               | 14               |                      |    |
| <b><u>Rv2220/GlnA1</u></b>  | GGYFPVAPNDQYVDLR(2)        | 7.96                       | 8.96                     | 1811.88 | 905.94             | 727.36     | 0.003            | 35               | 15                   |    |
|                             |                            |                            |                          |         |                    | 474.33     | 0.003            | 35               | 11                   |    |
|                             | IPITGSNPK(2)               | 5.43                       | 6.43                     | 925.54  | 463.77             | 602.39     | 0.003            | 35               | 11                   |    |
|                             |                            |                            |                          |         |                    | 659.41     | 0.003            | 35               | 12                   |    |
|                             |                            |                            |                          |         |                    | 734.32     | 0.006            | 35               | 15                   |    |
|                             |                            |                            |                          |         |                    | 862.38     | 0.006            | 35               | 15                   |    |
|                             |                            |                            |                          |         |                    | 1058.50    | 0.006            | 35               | 15                   |    |
|                             |                            |                            |                          |         |                    | 908.45     | 0.006            | 35               | 35                   |    |
|                             |                            |                            |                          |         |                    | 1119.54    | 0.006            | 35               | 29                   |    |
|                             |                            |                            |                          |         |                    | 1386.70    | 0.006            | 35               | 31                   |    |
|                             |                            |                            |                          |         |                    | 603.31     | 0.005            | 35               | 17                   |    |
|                             |                            |                            |                          |         |                    | 716.39     | 0.005            | 35               | 17                   |    |
|                             |                            |                            |                          |         |                    | 813.45     | 0.005            | 35               | 13                   |    |

| Gene /Protein Name          | Peptide Sequence (z)         | Retention Time Start (min) | Retention Time End (min) | [M+H]   | Average Mass [m/z] | Transition | Dwell Time (sec) | Cone Voltage (V) | Collision Energy (V) |
|-----------------------------|------------------------------|----------------------------|--------------------------|---------|--------------------|------------|------------------|------------------|----------------------|
| <b><u>Rv2220/GlnA1</u></b>  | LVPGYEAPINLVYSQR(2)          | 9.02                       | 9.92                     | 1817.98 | 909.99             | 992.55     | 0.013            | 35               | 28                   |
|                             |                              |                            |                          |         |                    | 1089.61    | 0.013            | 35               | 34                   |
|                             |                              |                            |                          |         |                    | 1160.64    | 0.013            | 35               | 32                   |
|                             |                              |                            |                          |         |                    | 852.42     | 0.011            | 35               | 31                   |
|                             | SVFDDGLAFDGSIR(2)            | 8.57                       | 9.57                     | 1584.76 | 793.38             | 965.51     | 0.011            | 35               | 22                   |
|                             |                              |                            |                          |         |                    | 1022.53    | 0.011            | 35               | 23                   |
|                             |                              |                            |                          |         |                    | 943.50     | 0.005            | 35               | 31                   |
|                             |                              |                            |                          |         |                    | 1040.55    | 0.005            | 35               | 29                   |
| <b><u>Rv2244/AcpM</u></b>   | IESENPDAVANVQAR(2)           | 5.61                       | 6.41                     | 1611.80 | 806.90             | 828.47     | 0.005            | 35               | 22                   |
|                             |                              |                            |                          |         |                    | 943.50     | 0.005            | 35               | 31                   |
|                             | LEEENPEAAQALR(2)             | 5.83                       | 6.63                     | 1469.30 | 735.65             | 758.42     | 0.003            | 35               | 30                   |
|                             |                              |                            |                          |         |                    | 855.47     | 0.003            | 35               | 30                   |
|                             |                              |                            |                          |         |                    | 969.51     | 0.003            | 35               | 31                   |
|                             |                              |                            |                          |         |                    | 773.42     | 0.006            | 35               | 19                   |
|                             | IPDEDLAQLR(2)                | 6.75                       | 7.55                     | 1097.59 | 549.79             | 888.44     | 0.006            | 35               | 19                   |
|                             |                              |                            |                          |         |                    | 985.49     | 0.006            | 35               | 19                   |
|                             | TVGDVVAYIQK(2)               | 6.08                       | 7.08                     | 1191.66 | 596.83             | 622.36     | 0.003            | 35               | 20                   |
|                             |                              |                            |                          |         |                    | 721.42     | 0.003            | 35               | 17                   |
| 820.49                      |                              |                            |                          |         |                    | 0.003      | 35               | 18               |                      |
| 703.37                      |                              |                            |                          |         |                    | 0.003      | 35               | 19               |                      |
| <b><u>Rv2376c/Cfp2</u></b>  | GSLVEGGIGGTEAR(2)            | 5.42                       | 6.92                     | 1301.67 | 651.84             | 760.39     | 0.003            | 35               | 22                   |
|                             |                              |                            |                          |         |                    | 817.42     | 0.003            | 35               | 21                   |
|                             |                              |                            |                          |         |                    | 665.36     | 0.003            | 35               | 20                   |
|                             |                              |                            |                          |         |                    | 779.40     | 0.003            | 35               | 23                   |
|                             |                              |                            |                          |         |                    | 876.46     | 0.003            | 35               | 19                   |
| <b><u>Rv2626c/Hrp1</u></b>  | DSIYYVDANASIQEMLNVMEEHQVR(3) | 7.1                        | 8.1                      | 2956.83 | 985.46             | 1027.50    | 0.006            | 35               | 45                   |
|                             |                              |                            |                          |         |                    | 1141.54    | 0.006            | 35               | 42                   |
|                             |                              |                            |                          |         |                    | 1254.63    | 0.006            | 35               | 35                   |
|                             |                              |                            |                          |         |                    | 616.34     | 0.003            | 35               | 22                   |
| <b><u>Rv2780/Ald</u></b>    | GLSTHEGALLSER(3)             | 5.79                       | 6.79                     | 1370.22 | 457.41             | 717.39     | 0.003            | 35               | 22                   |
|                             |                              |                            |                          |         |                    | 788.43     | 0.003            | 35               | 29                   |
|                             |                              |                            |                          |         |                    | 504.28     | 0.003            | 35               | 17                   |
| <b><u>RV2878c/Mpt53</u></b> | LQFTATTLGAPFDGASLQGK(2)      | 8.87                       | 10.87                    | 2109.09 | 1055.54            | 617.36     | 0.003            | 35               | 18                   |
|                             |                              |                            |                          |         |                    | 688.40     | 0.003            | 35               | 16                   |
|                             |                              |                            |                          |         |                    | 1019.52    | 0.013            | 35               | 33                   |
|                             |                              |                            |                          |         |                    | 1147.57    | 0.013            | 35               | 38                   |
|                             |                              |                            |                          |         |                    | 1234.61    | 0.013            | 35               | 33                   |
| <b><u>Rv3248c/SahH</u></b>  | EYAEVQLK(2)                  | 5.85                       | 6.85                     | 1076.57 | 538.78             | 357.25     | 0.003            | 35               | 17                   |
|                             |                              |                            |                          |         |                    | 584.38     | 0.003            | 35               | 18                   |
|                             |                              |                            |                          |         |                    | 784.46     | 0.003            | 35               | 17                   |
|                             |                              |                            |                          |         |                    | 646.39     | 0.003            | 35               | 19                   |
| <b><u>Rv3418c/GroES</u></b> | DVLAVVSK(2)                  | 6.55                       | 7.55                     | 831.55  | 415.75             | 747.44     | 0.003            | 35               | 23                   |
|                             |                              |                            |                          |         |                    | 876.48     | 0.003            | 35               | 26                   |
|                             |                              |                            |                          |         |                    | 432.28     | 0.003            | 35               | 20                   |
|                             |                              |                            |                          |         |                    | 503.32     | 0.003            | 35               | 10                   |
|                             |                              |                            |                          |         |                    | 616.40     | 0.003            | 35               | 12                   |
| <b><u>Rv3441c/MrsA</u></b>  | LAATVADAVSTAR(2)             | 6.13                       | 7.13                     | 1244.87 | 623.44             | 531.28     | 0.006            | 35               | 30                   |
|                             |                              |                            |                          |         |                    | 913.54     | 0.006            | 35               | 37                   |
|                             |                              |                            |                          |         |                    | 1000.57    | 0.006            | 35               | 36                   |
|                             |                              |                            |                          |         |                    | 609.36     | 0.007            | 35               | 22                   |
|                             |                              |                            |                          |         |                    | 710.41     | 0.007            | 35               | 23                   |
| <b><u>Rv3803c/FbpD</u></b>  | WHDPWVHASLLAQNTR(3)          | 5.82                       | 6.82                     | 2045.02 | 682.34             | 825.44     | 0.007            | 35               | 28                   |
|                             |                              |                            |                          |         |                    | 719.37     | 0.003            | 35               | 25                   |
|                             |                              |                            |                          |         |                    | 790.41     | 0.003            | 35               | 19                   |
|                             |                              |                            |                          |         |                    | 889.47     | 0.003            | 35               | 19                   |
|                             |                              |                            |                          |         |                    | 443.24     | 0.003            | 35               | 19                   |
| <b><u>Rv3804c/Ag85a</u></b> | FLEGFVR(2)                   | 7.54                       | 8.54                     | 867.80  | 434.40             | 757.36     | 0.003            | 35               | 23                   |
|                             |                              |                            |                          |         |                    | 870.44     | 0.003            | 35               | 25                   |
|                             |                              |                            |                          |         |                    | 870.44     | 0.003            | 35               | 25                   |
|                             |                              |                            |                          |         |                    | 546.29     | 0.003            | 35               | 14                   |
|                             |                              |                            |                          |         |                    | 659.37     | 0.003            | 35               | 20                   |
| <b><u>Rv3803c/FbpD</u></b>  | WHDPWVHASLLAQNTR(3)          | 5.82                       | 6.82                     | 2045.02 | 682.34             | 758.44     | 0.003            | 35               | 17                   |
|                             |                              |                            |                          |         |                    | 703.35     | 0.003            | 35               | 24                   |
|                             |                              |                            |                          |         |                    | 816.43     | 0.003            | 35               | 24                   |
|                             |                              |                            |                          |         |                    | 929.52     | 0.003            | 35               | 29                   |
| <b><u>Rv3804c/Ag85a</u></b> | FLEGFVR(2)                   | 7.54                       | 8.54                     | 867.80  | 434.40             | 478.28     | 0.006            | 35               | 15                   |
|                             |                              |                            |                          |         |                    | 607.32     | 0.006            | 35               | 15                   |
|                             |                              |                            |                          |         |                    | 720.40     | 0.006            | 35               | 15                   |
|                             |                              |                            |                          |         |                    | 530.33     | 0.003            | 35               | 18                   |
|                             |                              |                            |                          |         |                    | 643.41     | 0.003            | 35               | 18                   |
| <b><u>Rv3804c/Ag85a</u></b> | NDPLLVGK(2)                  | 6.42                       | 7.42                     | 968.54  | 485.27             | 740.47     | 0.003            | 35               | 18                   |
|                             |                              |                            |                          |         |                    | 740.47     | 0.003            | 35               | 18                   |

| Gene /Protein Name          | Peptide Sequence (z)    | Retention Time Start (min) | Retention Time End (min) | [M+H]   | Average Mass [m/z] | Transition | Dwell Time (sec) | Cone Voltage (V) | Collision Energy (V) |
|-----------------------------|-------------------------|----------------------------|--------------------------|---------|--------------------|------------|------------------|------------------|----------------------|
| <b><u>Rv3804c/Ag85a</u></b> | ALGATPNTGPAPQGA(2)      | 5.75                       | 6.65                     | 1321.68 | 661.84             | 372.19     | 0.003            | 35               | 23                   |
|                             |                         |                            |                          |         |                    | 540.28     | 0.003            | 35               | 23                   |
|                             |                         |                            |                          |         |                    | 909.44     | 0.003            | 35               | 23                   |
|                             | VQFQSGGANSPALYLLDGLR(3) | 13.06                      | 14.16                    | 2106.11 | 702.70             | 849.48     | 0.063            | 35               | 27                   |
|                             |                         |                            |                          |         |                    | 962.57     | 0.063            | 35               | 27                   |
| 1130.66                     |                         |                            |                          |         |                    | 0.063      | 35               | 33               |                      |
|                             |                         |                            |                          |         |                    |            |                  |                  |                      |
| <b><u>Rv3841/BfrB</u></b>   | AGANLFELENFVAR(2)       | 11.5                       | 13.5                     | 1551.83 | 775.90             | 848.46     | 0.03             | 35               | 30                   |
|                             |                         |                            |                          |         |                    | 977.51     | 0.03             | 35               | 23                   |
|                             | TVTDQVGR(2)             | 5.1                        | 5.9                      | 874.47  | 438.23             | 1124.57    | 0.03             | 35               | 22                   |
|                             |                         |                            |                          |         |                    | 459.27     | 0.004            | 35               | 17                   |
|                             |                         |                            |                          |         |                    | 574.29     | 0.004            | 35               | 14                   |
|                             |                         |                            |                          |         |                    | 675.34     | 0.004            | 35               | 14                   |
|                             | EALALALDQER(2)          | 7.3                        | 9.3                      | 1227.66 | 614.83             | 660.33     | 0.006            | 35               | 18                   |
|                             |                         |                            |                          |         |                    | 731.37     | 0.006            | 35               | 16                   |
|                             |                         |                            |                          |         |                    | 844.45     | 0.006            | 35               | 22                   |
|                             |                         |                            |                          |         |                    |            |                  |                  |                      |
| <b><u>Rv3874/Cfp10</u></b>  | GAAGTAAQAAVVR(2)        | 6.84                       | 7.84                     | 1143.64 | 571.82             | 643.39     | 0.003            | 35               | 25                   |
|                             |                         |                            |                          |         |                    | 714.43     | 0.003            | 35               | 25                   |
|                             |                         |                            |                          |         |                    | 785.46     | 0.003            | 35               | 16                   |
|                             | QELDEISTNIR(2)          | 6.8                        | 7.8                      | 1316.72 | 659.36             | 703.41     | 0.006            | 35               | 28                   |
|                             |                         |                            |                          |         |                    | 832.45     | 0.006            | 35               | 25                   |
|                             |                         |                            |                          |         |                    | 947.48     | 0.006            | 35               | 23                   |
|                             | TQIDQVESTAGSLQGQWR(3)   | 5.96                       | 6.96                     | 2003.99 | 668.66             | 674.34     | 0.003            | 35               | 30                   |
|                             |                         |                            |                          |         |                    | 787.42     | 0.003            | 35               | 27                   |
| <b><u>Rv3875/ESAT-6</u></b> | WDATATELNNALQNLAR(2)    | 10.87                      | 12.87                    | 1899.96 | 950.98             | 874.45     | 0.003            | 35               | 25                   |
|                             |                         |                            |                          |         |                    | 1013.55    | 0.03             | 35               | 31                   |
|                             |                         |                            |                          |         |                    | 1126.63    | 0.03             | 35               | 31                   |
|                             |                         |                            |                          |         |                    | 1255.68    | 0.03             | 35               | 31                   |
