# Supplementary material for: Detection of Mycobacterium tuberculosis Peptides in the Exosomes of Patients with Active and Latent M. tuberculosis Infection Using MRM-MS
Source: PubMed Central journal article supplement (PMC4117584; doi:10.1371/journal.pone.0103811), 2014-07-31
Supplement: pone.0103811.s004.pdf [file pone.0103811.s004.pdf]

| Mtb Peptide Sequence | Potential Interfering Peptides (human tryptic) |                        |                                  | Transitions         |    |
|----------------------|------------------------------------------------|------------------------|----------------------------------|---------------------|----|
|                      | Q1                                             | RT                     | Human Peptide Sequence           |                     |    |
| LPNISASVPQLVAAIK     | 809.75                                         | 30.44                  | TGSLKPNPASPLPASPYPGGTPASY        | y8                  |    |
|                      | 810.44                                         | 32.81                  | HNELTGDNVGPLILK                  | y10                 |    |
|                      | 810.07                                         | 32.87                  | VITHTSGWDSSPGAGFQVPEVR           | y9                  |    |
|                      | 810.73                                         | 33.12                  | WAETVRPEEVSQEHIETAYR             | y8                  |    |
|                      | 810.94                                         | 34.71                  | IDGLNVADIGLHDLR                  | y9                  |    |
|                      | 811.1                                          | 34.73                  | QHNSGPNPKPVVFSIAGLTAPPGR         | y8                  |    |
|                      | 810.41                                         | 38.69                  | DSTVAVVVYDITNVNSFQQTTK           | y8                  |    |
|                      | QELDEISTNIR                                    | 659.33                 | 20.25                            | DIIGDTSGHFQK        | y6 |
|                      |                                                | 657.99                 | 22.02                            | VSQTETGSWSAETAPGVHK | y6 |
|                      |                                                | 657.99                 | 23.39                            | TQHLSVETSYLQHESGR   | y6 |
| 659.37               |                                                | 23.67                  | DVGAQILLHSHK                     | y8                  |    |
| 659.32               |                                                | 23.88                  | HFNSMSGPATLR                     | y7                  |    |
| 658.86               |                                                | 24.13                  | LATSLGASEQALR                    | y6                  |    |
| 658.33               |                                                | 24.63                  | AFHQWIQETR                       | y7                  |    |
| 658.96               |                                                | 24.83                  | YC[160]LEHGIQPDGQMPSDK           | y6                  |    |
| 658.96               |                                                | 25.62                  | VVIC[160]HLPC[160]MNGGQC[160]SSR | y7                  |    |
| 658.36               |                                                | 25.8                   | EPISVSSEQVLK                     | y6                  |    |
| VIQGFMIQGGDPTGTGR    | 658.98                                         | 26.25                  | EDLPNLESSEETEQINK                | y6                  |    |
|                      | 658.84                                         | 26.37                  | YFFTSVSRPGR                      | y7                  |    |
|                      | 658.3                                          | 26.83                  | SSLSSNDDGYENIDSLTR               | y8                  |    |
|                      | 659.33                                         | 28.32                  | MC[160]LEANIPLEK                 | y7                  |    |
|                      | 658                                            | 28.34                  | SQLLSNHQQLQADSFK                 | y6                  |    |
|                      | 658.86                                         | 28.37                  | QLSTALEGAASLR                    | y6                  |    |
|                      | 866.74                                         | 25.16                  | SSPELDPVMKPDGSSSANEQAVQ          | y10                 |    |
|                      | 867.77                                         | 26.04                  | TQPSSGVDSAVGTLPATSPQSTSVQAK      | y10                 |    |
|                      | 865.93                                         | 26.45                  | SELEEQLTPVAEETR                  | y6                  |    |
|                      | 867.43                                         | 27.18                  | QISETNVILSMDNRR                  | y6                  |    |
| WHPDWVHASLLAQNNTR    | 867.43                                         | 27.58                  | MFIQTQDTPNPNSLK                  | y6                  |    |
|                      | 866.42                                         | 27.8                   | VVVLMSGSTDLGHC[160]EK            | y10                 |    |
|                      | 865.94                                         | 29                     | VGPQYQAVVPDFPAK                  | y11                 |    |
|                      | 867.42                                         | 29.07                  | LSESGAIMTDLEENPK                 | y10                 |    |
|                      | 865.93                                         | 29.23                  | VSDTVVEPYNATLSVH                 | y6                  |    |
|                      | 867.42                                         | 29.93                  | WETPYMHALAAAASSK                 | y10                 |    |
|                      | 866.93                                         | 29.98                  | LMAVQLLDSSNQEER                  | y11                 |    |
|                      | 866.4                                          | 30.09                  | ESNEEQVWHFLGK                    | y10                 |    |
|                      | 865.94                                         | 31.03                  | VLNTGSDVEEAVADALK                | y10                 |    |
|                      | 867.47                                         | 32.58                  | YGLIYHASLVGQTSFK                 | y6                  |    |
| LRPDILAQQQVAAAK      | 866.75                                         | 32.96                  | VEKPTADAEAYVFTPNMIC[160]AGGEK    | y6                  |    |
|                      | 866.47                                         | 33.02                  | SGQQGQFLIQQVTLK                  | y6                  |    |
|                      | 867.47                                         | 33.53                  | ITFTPSSGIASEVTPK                 | y6                  |    |
|                      | 867.43                                         | 34.2                   | EEVTVTVWQEGSLK                   | y6                  |    |
|                      | 682                                            | 35.38                  | NNQFQALLQYADPVSAQH               | y8 y7 y6            |    |
|                      | 682.01                                         | 35.43                  | SGGGDIHQGFQSLLEVNK               | y7 y6               |    |
|                      | 680.85                                         | 33.5                   | IC[160]EVINEAVWK                 | y8                  |    |
|                      | 680.88                                         | 33.6                   | GLETAGGVMTALIK                   | y7                  |    |
|                      | 682.38                                         | 33.69                  | YIAEAVASIVEAK                    | y7                  |    |
|                      | 681.97                                         | 34.3                   | AWVVWNTHADFADEC[160]PKP          | y7                  |    |
| 682.03               | 34.51                                          | IGQLQGEIIPTSFYHQGR     | y7                               |                     |    |
| 681.36               | 34.74                                          | TGEIVLTQSPGTLSPGER     | y8                               |                     |    |
| 681.98               | 34.93                                          | VSEDFEDLLSNQGFSSR      | y8                               |                     |    |
| 682.66               | 35.46                                          | VEDAYILTC[160]NVSLEYEK | y7                               |                     |    |
| 682.34               | 36.35                                          | VSALLGEEDEEALHYLTR     | y8                               |                     |    |
| 681.66               | 36.75                                          | ALDFEQEMATVASSSLEK     | y8                               |                     |    |
| 682.31               | 37.79                                          | GEYPDYQQWMGLSDSIR      | y8                               |                     |    |
| 682.35               | 37.83                                          | SVDVFGSTPFQFLTSTSK     | y8                               |                     |    |
| 682.69               | 38.17                                          | ESLSQPGDFVLSVLSQDPK    | y6                               |                     |    |
| 682.37               | 38.22                                          | ISGVGIDQPPYGIFVINQK    | y7                               |                     |    |
| 681.67               | 39.31                                          | GFDGIPDNVDAALALPAHSY   | y7                               |                     |    |
| 682.36               | 39.52                                          | ADHDVGSSELPEGVLGALLR   | y8                               |                     |    |
| 680.88               | 39.68                                          | MNSVVALDLAISK          | y8                               |                     |    |
| 682.02               | 41.27                                          | IGQIDGLISQLEMDQQAGK    | y7                               |                     |    |
| 681.38               | 41.3                                           | SPSELFAQHIVIVHHVK      | y8                               |                     |    |
| 681.01               | 42.32                                          | HILYGC[160]SELFNATQFIK | y6                               |                     |    |
| 682.67               | 43.12                                          | ADAVQDSEMVELVELEIR     | y7                               |                     |    |
| 682.04               | 43.27                                          | LHLIYLINDVLHHC[160]QR  | y6                               |                     |    |
| LRPDILAQQQVAAAK      | 559.27                                         | 24.49                  | EEEDFHVDQVTTVK                   | y7 y6               |    |
|                      | 559.78                                         | 29.3                   | FYFENALSK                        | y8 y6               |    |
|                      | 559.26                                         | 29.61                  | GHPGDTPFGTFTLTGGN                | y8 y7               |    |

|                    |        |       |                              |        |
|--------------------|--------|-------|------------------------------|--------|
|                    | 560.6  | 21.17 | VLATLC[160]GQESTDTER         | y7     |
|                    | 559.61 | 21.22 | AIQLTYNPDESSKPN              | y8     |
|                    | 559.27 | 21.24 | VELEDWNGR                    | y8     |
|                    | 558.81 | 22.28 | QTVSWAVTPK                   | y8     |
|                    | 559.92 | 24.32 | FSPATHPSEGLEENY              | y6     |
|                    | 560.58 | 24.48 | SFTAVC[160]QDDGTWHR          | y6     |
|                    | 558.82 | 24.72 | SLGSAEALLQK                  | y8     |
|                    | 559.28 | 25.12 | MILIQDGSQNTNVDK              | y8     |
|                    | 560.63 | 25.41 | DSLQASLRPHADELK              | y7     |
|                    | 559.31 | 25.63 | LQSGSVTVNALHPGVAR            | y7     |
|                    | 558.76 | 26    | SEQFTAMFR                    | y8     |
|                    | 560.24 | 26.05 | EHFQSYDLDHMEK                | y8     |
|                    | 559.91 | 26.81 | AGPDLASC[160]LDVDEC[160]R    | y8     |
|                    | 559.31 | 27.35 | HINAQLNLDSLPRGK              | y8     |
|                    | 559.29 | 27.56 | EAALYPHLPPEADPR              | y6     |
|                    | 559.29 | 28.52 | EVESVDLPHC[160]HLIK          | y8     |
|                    | 559.33 | 28.69 | THHILIDLR                    | y7     |
|                    | 560.29 | 29.14 | LLDYVATVEDEAAAAK             | y6     |
|                    | 559.59 | 29.31 | SISDNAYQYMLTDR               | y6     |
|                    | 559.61 | 29.77 | GMC[160]RPLALGGPGQVTY        | y7     |
|                    | 559.94 | 30.37 | GDVGMAGVAIDTVEDTK            | y7     |
|                    | 559.27 | 30.53 | MSSPC[160]HIEMILTEK          | y8     |
| WDATATELNNALQNLAR  | 950.13 | 43.24 | ADTHDEILEGLNFNLTEIPEAQIHE    | y10 y9 |
|                    | 949.51 | 36.9  | AASDIWKPVLSIDTEPR            | y10    |
|                    | 950.01 | 39.59 | INESAEGEIIDGINIAK            | y11    |
|                    | 950.99 | 39.87 | VLEGHTDFINGLVFDPK            | y10    |
|                    | 950.86 | 40.92 | PSLPSEPVVALDPIDPPGKPEVINTR   | y10    |
|                    | 949.51 | 42.87 | QEPSLGC[160]SIPAILFLPR       | y10    |
|                    | 949.55 | 42.96 | AGVASLLTTAEVVVTEIPK          | y9     |
| FAPLNSWPDNASLDK    | 836.75 | 31.8  | TPMDSTGVPHILEHTVLC[160]GSQK  | y9 y8  |
|                    | 836.77 | 36.3  | IPQSHIQIC[160]JETILTSGENLAR  | y10 y9 |
|                    | 837.94 | 26.56 | NGVAQEPVHLDSPAIAK            | y9     |
|                    | 837.45 | 26.84 | FVQEVVQSQQVAVGR              | y9     |
|                    | 836.96 | 27.72 | VELQAQTTTLEQAIK              | y10    |
|                    | 837.39 | 31.48 | QWVDTDDTSSENTVVPPEYVK        | y10    |
|                    | 836.72 | 34.47 | VTYHPDGPEGQAYDVDFTPPFR       | y9     |
|                    | 837.97 | 34.7  | HIGKPLLGGPFSLTTH             | y8     |
|                    | 837.4  | 35.82 | NIC[160]WGTQSKPLYETIEDNDVK   | y10    |
| TTGDPPFPQQPPVANDTR | 982.42 | 25.7  | C[160]EEVIPDEEFDPQNSR        | y12    |
|                    | 981.51 | 26.58 | HSSHGSDVLSLQILKPNR           | y8     |
| SLADPNVSFANK       | 630.89 | 19.49 | DYHFEC[160]YHC[160]EDC[160]R | y8     |
|                    | 631.3  | 20.45 | C[160]QGPPGVDLYR             | y6     |
|                    | 630.61 | 21.6  | SLTEEAENWGDGEPNNK            | y6     |
|                    | 631.82 | 25.17 | TIAMDGTEGLVR                 | y8     |
|                    | 631.67 | 25.93 | AHQGTGAGISPVILNSGEGK         | y7     |
|                    | 631.84 | 27.04 | LTC[160]VVESSVLR             | y8     |
|                    | 630.67 | 27.2  | VAVHPGGDTVAIGGVDGNVR         | y6     |
| GLAAGLDPNTATAGELAR | 565.31 | 25.47 | ELVAENLSVR                   | y8 y7  |
|                    | 564.82 | 24.8  | ALGLASGELAAR                 | y6     |
|                    | 565.61 | 25.2  | TVGEGEDHDIPIGIDK             | y7     |
|                    | 566.63 | 25.64 | VLETEAVDQPDVVQR              | y6     |
|                    | 565.64 | 25.75 | LIAPVAEEEEATVPNNK            | y7     |
|                    | 566.63 | 26.52 | ILLTDGDPTVGETNPR             | y6     |
|                    | 565.31 | 26.96 | IEVLEELR                     | y8     |
|                    | 565.95 | 27.53 | VDVDIPDVNIEGPDAK             | y6     |
|                    | 565.61 | 28.49 | ALEPSAVQEEFMTSR              | y7     |
|                    | 565.64 | 28.98 | SRPVGHG[160]LEAAAVLSK        | y8     |
|                    | 565.62 | 29.75 | LRPIYDYLDNGNNK               | y7     |
|                    | 565.35 | 29.83 | IDISQLVITK                   | y8     |
|                    | 565.59 | 30.88 | IFDLQDWTQEDER                | y7     |
|                    | 566.3  | 31.3  | DLPPDTLLDLQNNK               | y6     |
|                    | 565.28 | 31.53 | AQATWTELPWPHEK               | y8     |
|                    | 565.31 | 32.39 | PSPIQEEESIPIALSGR            | y6     |
|                    | 565.61 | 32.98 | AAGLAFSDGDQWTLR              | y7     |
|                    | 565.29 | 33.11 | VDYLVTEEEINLTR               | y6     |
|                    | 566.62 | 33.15 | IC[160]DQISDAVLDAHLK         | y7     |
|                    | 565.93 | 33.61 | GFGFVTFDDHDPVVK              | y7     |
|                    | 565.65 | 33.64 | MSPQALNPSALLSR               | y7     |
|                    | 566.28 | 33.86 | C[160]GITVSQVSNWFGNK         | y6     |
|                    | 565.28 | 33.93 | ADMGGAATIC[160]SAIVSAAK      | y8     |
| TQIDQVESTAGSLQGQWR | 668.31 | 26.79 | FASENDLPEWK                  | y7 y6  |
|                    | 666.84 | 24.9  | AGYAHFLNVQGR                 | y7     |

|                          |        |       |                                  |          |
|--------------------------|--------|-------|----------------------------------|----------|
|                          | 668.32 | 25.37 | SGFHGDC[160]LTLTK                | y7       |
|                          | 668.88 | 25.71 | IVEHPSDLIVSK                     | y5       |
|                          | 667.88 | 27.42 | IHLPETVEQLR                      | y7       |
|                          | 668.37 | 27.56 | LALYQTAIESAR                     | y7       |
|                          | 667.35 | 28.07 | KPFDEIGGPAFR                     | y6       |
|                          | 668.04 | 30.22 | LTGKPGQVLPHPCLC[160]TVR          | y7       |
|                          | 668.86 | 30.34 | FVLDTSESVALR                     | y5       |
|                          | 667.34 | 30.37 | ISHLGTPLYLAC[160]ENQQR           | y5       |
|                          | 668.01 | 30.49 | IPEISIQDMTAQVTSPSGK              | y7       |
|                          | 668.68 | 30.68 | EQANAVSEAVVSSVNTVATK             | y7       |
|                          | 668.65 | 30.82 | SDDIYNQVSAYPLPEHR                | y6       |
|                          | 668.01 | 32.93 | RPTEIC[160]ADPQFIIGGATR          | y7       |
| FLEGFVR                  | 434.22 | 26.05 | SNYLAWYQQK                       | y5 y4    |
|                          | 433.23 | 34.68 | ATMC[160]NLLAYLK                 | y6 y5    |
|                          | 433.9  | 35.36 | IFTMAEVYIGIR                     | y5 y4    |
|                          | 434.55 | 25.98 | SVTGGMC[160]SVYLK                | y5       |
|                          | 432.89 | 26.24 | TMFIGGSQLSQK                     | y5       |
|                          | 433.9  | 26.4  | TSC[160]ALTIHAIGR                | y4       |
|                          | 432.89 | 27.58 | FTTDAIALAMSR                     | y6       |
|                          | 433.93 | 27.8  | SLGVTQLAVAVNK                    | y5       |
|                          | 434.25 | 28.71 | TVIVHGFTLGEK                     | y5       |
|                          | 433.25 | 28.9  | DVQEIATVVVVK                     | y4       |
|                          | 433.54 | 29.2  | VC[160]FGDFPTMPK                 | y6       |
|                          | 432.92 | 30.17 | PPPSIPTFATLR                     | y5       |
|                          | 433.92 | 30.59 | STLQTLPEIVAK                     | y5       |
|                          | 434.55 | 30.77 | GAVYSMVEFNGK                     | y4       |
|                          | 433.26 | 32.05 | LTHLHYDPVVK                      | y6       |
|                          | 434.22 | 32.39 | DGTLVSFTADFK                     | y6       |
|                          | 433.9  | 32.63 | SLIINTFYSNK                      | y5       |
|                          | 433.23 | 35.49 | FMPLSDVLYGR                      | y5       |
| AELPGVDPDK               | 520.77 | 18.64 | HLC[160]AEAALR                   | y6 y3    |
|                          | 519.28 | 14.59 | QHIQDGLR                         | y3       |
|                          | 519.78 | 16.62 | VIVGGSSEYK                       | y7       |
|                          | 519.93 | 17.4  | LQMEQQQLQQR                      | y6       |
|                          | 519.6  | 17.83 | SPVGSGAPQAAAPAPAAH               | y6       |
|                          | 520.27 | 18.92 | ETGYTELVK                        | y3       |
|                          | 520.57 | 18.96 | HGIQYFNNNTQHS                    | y7       |
|                          | 519.6  | 19.48 | ILSEVTPDQSKPEN                   | y3       |
|                          | 519.76 | 20.01 | YSGTLNLDR                        | y6       |
|                          | 519.93 | 20.12 | NGQIQYSIGGPNPGR                  | y6       |
|                          | 519.91 | 20.55 | GASWIDTADGSANHR                  | y6       |
|                          | 520.59 | 21.14 | LLETQEIEIDGR                     | y3       |
| ILVQANEAEITTTASGLVIPDTAK | 781.39 | 29.01 | NEEQGIPLEYLEK                    | y5       |
|                          | 780.69 | 30.57 | YPSDIAVEWESNGQPENNYK             | y5       |
|                          | 780.91 | 31.48 | IITDGVITDLDETR                   | y5       |
|                          | 781.42 | 31.92 | MANITSSQILDQLK                   | y5       |
|                          | 779.9  | 32.49 | SLPSLDEEPVTFPK                   | y5       |
|                          | 781.74 | 32.76 | TETITGFQVDVAVPANGQTPIQR          | y9       |
|                          | 781.06 | 36.13 | VFPPEVAVFEPSEAEISHTQK            | y9       |
|                          | 781.38 | 36.59 | ILSMANAGPNTNGSQFFIC[160]TAK      | y9       |
|                          | 780.37 | 37.5  | ISPDTSLLLDC[160]GEGTFGQLC[160]JR | y9       |
|                          | 780.71 | 37.62 | HPSAVTAC[160]NLDLENLITDSNR       | y5       |
|                          | 779.92 | 38.48 | C[160]DAVLC[160]TLPLGVLK         | y10      |
|                          | 780.94 | 38.55 | SLGLETAGGVMTALIK                 | y5       |
| TADGINYR                 | 453.74 | 11.35 | GGGLSVSSSR                       | y5       |
|                          | 454.23 | 12.1  | MGPPVGGHR                        | y5       |
|                          | 455.55 | 12.36 | VSAGNENAC[160]LTTK               | y5       |
|                          | 455.27 | 12.46 | AAAVHTAIR                        | y5       |
|                          | 454.23 | 16.99 | SEAIQTSHFQGR                     | y4       |
| FLSAATSSTPR              | 568.24 | 16.76 | ELVSC[160]SNC[160]TDYQAR         | y8       |
|                          | 567.84 | 19.42 | HLVLAGGSKPR                      | y6       |
|                          | 569.3  | 20.88 | VAFTGSTEIGR                      | y7       |
|                          | 568.78 | 21.19 | TQAFEADNLK                       | y6       |
|                          | 568.33 | 21.47 | VALHNLINNK                       | y6       |
|                          | 567.81 | 23.84 | ELGTGQFGVVK                      | y8       |
|                          | 568.31 | 23.84 | QFVTATDVVR                       | y6       |
|                          | 568.25 | 23.84 | ENYPNAGLTMNYC[160]JR             | y6       |
|                          | 569.28 | 24.72 | YYYIPQYK                         | y6       |
|                          | 568.63 | 24.8  | HHPPTLAVGIC[160]SPASR            | y8       |
| SLENYIAQTR               | 596.63 | 19.72 | DSSSTDSANEKPALIPR                | y8 y7 y6 |
|                          | 596.62 | 19.9  | HGAGAEISTVNPEQYSK                | y7 y6    |
|                          | 597.81 | 16.7  | EAYGAVTQTVR                      | y8       |

|                   |         |       |                                    |       |
|-------------------|---------|-------|------------------------------------|-------|
|                   | 597.79  | 18.4  | ESLSTAAEC[160]VK                   | y7    |
|                   | 596.83  | 21.22 | VIDVPDAPAAPK                       | y7    |
|                   | 597.8   | 21.26 | EAAENSLVAYK                        | y8    |
|                   | 597.34  | 23    | ASAPLPGLSAPGR                      | y7    |
|                   | 597.61  | 23.26 | QEC[160]SIPVC[160]GQDQVTVA         | y6    |
|                   | 596.82  | 23.98 | GALEAYVQSVR                        | y6    |
|                   | 596.29  | 24.28 | AALADDFDTPR                        | y7    |
|                   | 596.8   | 24.76 | AGQAVDDFIEK                        | y7    |
|                   | 597.64  | 24.76 | SEAAHQGVITWNPPQR                   | y8    |
|                   | 597.93  | 25.11 | PDGDVGGPWC[160]YTTNPR              | y6    |
|                   | 597.3   | 25.43 | FQEYHIQNEALAAK                     | y6    |
|                   | 597.63  | 25.57 | LVGAIVYYDQGHNDAR                   | y8    |
| GLSTHEGALLSER     | 455.91  | 20.15 | TQGLVPEHVETR                       | y4    |
|                   | 456.22  | 20.83 | C[160]QNLQLEGNK                    | y6    |
|                   | 456.59  | 21.99 | LYRPGSVAYVSR                       | y4    |
|                   | 456.91  | 22.65 | YGVSGSDQTLTIK                      | y4    |
|                   | 457.59  | 23.06 | HTVGHILSEHK                        | y5    |
|                   | 456.19  | 23.76 | MC[160]PDYQSYFR                    | y4    |
|                   | 456.55  | 24.13 | ALEQYEGESWR                        | y4    |
|                   | 456.73  | 24.2  | HTGPGLLSM                          | y5    |
|                   | 455.9   | 24.97 | GDFPSPHVSQPR                       | y4    |
|                   | 457.55  | 25.72 | LSC[160]C[160]QFAESLR              | y4    |
|                   | 457.55  | 26.52 | NTFTLSC[160]DGSLR                  | y4    |
|                   | 457.23  | 26.61 | AEMDQILHGLDK                       | y6    |
|                   | 457.23  | 26.72 | HIQPGAFDTLDR                       | y4    |
|                   | 456.58  | 26.75 | FVQLEGAHPLEK                       | y5    |
|                   | 456.24  | 28.99 | ITSGPFEPDLYK                       | y4    |
| WETFLTSELPQWLSANR | 1039.49 | 42.47 | QQLVELVAEQADLEQTFNPSDPDC[160]VDR   | y8    |
|                   | 1039.82 | 49.75 | TQDHENVALEAC[160]EFWLTAEQPIC[160]K | y11   |
| LYASAEATDSK       | 577.9   | 11.57 | C[160]EQC[160]QPGYYGDAQR           | y7    |
|                   | 577.61  | 13.31 | DPPSEANSIQSANATTK                  | y8    |
|                   | 577.93  | 13.89 | NQVIQTGPDEEGSDDK                   | y6    |
|                   | 577.81  | 14.05 | THQLSSPVTK                         | y8    |
|                   | 577.3   | 16.36 | GTHHGLLANPH                        | y7    |
|                   | 578.28  | 16.45 | GATVYATGTHAQVEDGR                  | y7    |
| IESENPDAVANVQAR   |         | N/A   |                                    |       |
| DGQLTIK           | 387.54  | 11.95 | VTVSSASPTSPK                       | y4    |
|                   | 387.86  | 12.47 | MENQALQEAK                         | y6    |
|                   | 386.72  | 12.68 | AVVVC[160]PK                       | y5    |
|                   | 387.85  | 14    | VDTC[160]HTPFGK                    | y4    |
|                   | 386.71  | 14.11 | VANPLSTA                           | y5    |
|                   | 386.73  | 14.84 | LEGIVNK                            | y6    |
|                   | 387.2   | 16.86 | TVEVAEGEAVR                        | y4    |
|                   | 387.87  | 19.41 | ITELTDENVK                         | y4    |
|                   | 386.54  | 19.65 | IPASWTNPSGK                        | y4    |
| SDGSGDTFLFTQYLSK  | 882.79  | 38.94 | ASVPDGFLSELTQQLAQATGKPPQY          | y9 y7 |
|                   | 881.91  | 32.78 | YQLQSQENFEAFMK                     | y7    |
|                   | 883.77  | 35.25 | DALPEYSTFDVNMKPVVQEPNQK            | y7    |
|                   | 881.9   | 35.98 | SLFTDLEAENDVLHC[160]               | y7    |
|                   | 883.43  | 37.63 | LGDVGMAELC[160]PGLLHPS             | y7    |
|                   | 881.97  | 40.1  | TFQTPDFIVPLTDLR                    | y9    |
|                   | 881.92  | 41.42 | QDLEMYGINYFEIK                     | y9    |
|                   | 883.42  | 41.52 | VEQIAAAQELNELDYDShNVN              | y9    |
| VIAINAEPNGR       | 576.29  | 17.52 | DVKPHNVIMIDHEHR                    | y7    |
|                   | 577.3   | 19    | AGYPTGTGVGPQAAAAAAK                | y7    |
|                   | 576.27  | 19.81 | LHHVSPADSGEYVC[160]R               | y8    |
|                   | 576.58  | 21.76 | SHSGNISC[160]MDFSSNGK              | y4    |
|                   | 576.94  | 22.2  | C[160]LGPEVTTQYGGQYR               | y7    |
| FLEGLTLR          | 473.9   | 26.32 | LYDEMPPSALQR                       | y5 y4 |
|                   | 474.57  | 26.52 | VDAETGDVFAIER                      | y6 y5 |
|                   | 474.57  | 27.26 | DEELSC[160]TVVELK                  | y6    |
|                   | 474.28  | 27.32 | YLG L P G S L K                    | y6    |
|                   | 473.58  | 27.6  | GFSVVADTPELQR                      | y4    |
|                   | 474.91  | 27.72 | QVAEAYEVLSDAK                      | y4    |
|                   | 474.61  | 27.78 | VVSQHQALLGTIR                      | y5    |
|                   | 474.58  | 28.36 | GQPLYLSC[160]ELNK                  | y5    |
|                   | 474.9   | 28.86 | PASEVINEYSWK                       | y4    |
|                   | 474.3   | 29.28 | IAFAITAIK                          | y6    |
|                   | 474.23  | 31.01 | DLNMDC[160]IVAEIK                  | y5    |
|                   | 474.92  | 32.02 | EHHFEAIALVEK                       | y5    |
|                   | 473.9   | 32.43 | MAVQDAVDALMQK                      | y5    |
|                   | 474.25  | 32.44 | INTQEYLDVLGR                       | y5    |

|                           |         |       |                                          |       |
|---------------------------|---------|-------|------------------------------------------|-------|
|                           | 473.6   | 33.26 | ANTTAFLTPLEIK                            | y4    |
|                           | 473.61  | 34.78 | LIQFLQASITER                             | y4    |
|                           | 473.93  | 34.9  | VSGISFPTTELLR                            | y6    |
| DSIYYVDANASIQEMLNVMEEHQVF | 985.8   | 42.34 | PGPASAGGSAEALLSDLHAFAGSAAWDDSAR          | y10   |
|                           | 985.16  | 45.24 | TNEIVVEEQYTPQSLATLESVFEQELGK             | y10   |
|                           | 985.18  | 45.4  | TPIVPVEDLPYTLMSVATIDSQHGIEK              | y10   |
|                           | 984.03  | 45.94 | IPYKPNYSLNLWSIMK                         | y10   |
|                           | 985.81  | 47.53 | HSSSTVFDLVEEYENIC[160]GSQVNLISK          | y9    |
|                           | 985.56  | 47.79 | VPIPC[160]YLIALVVGALESR                  | y8    |
|                           | 985.54  | 47.79 | NMTIPEDILGEIAVSIVR                       | y8    |
|                           | 985.47  | 50.02 | DYEFMWNPHLGYILTC[160]PSNLGTGLR           | y10   |
| AAVEEGIVAGGGVTLQAAPTDEL   | 1260.58 | 38.15 | LEQYEGPGFC[160]GPLASGTGGPFTTC[160]HAHVPE | y12   |
|                           | 1261.18 | 41.97 | LAQQYYLVYQEPIPTAQLVQR                    | y7    |
|                           | 1261.65 | 45.31 | VHLC[160]AAQLQLTNLEHDVYER                | y7    |
|                           | 1261.09 | 46.51 | VHNGIEYGMQLIC[160]EAYHLMK                | y7    |
| LAATVADAVSTAR             | 622.33  | 27.53 | IQLVEEELDR                               | y9 y8 |
|                           | 623.31  | 21.5  | DLEDESTPIVK                              | y8    |
|                           | 623.59  | 21.95 | MTC[160]VDVNEC[160]DELNNR                | y8    |
|                           | 622.3   | 22.03 | DIQMTQSPSSVSASVGDR                       | y8    |
|                           | 621.81  | 22.16 | MHLAVVAC[160]GER                         | y8    |
|                           | 623.29  | 22.81 | SPTASDMLHMR                              | y9    |
|                           | 622.3   | 22.85 | DVQMTQSPSSLSASVGDR                       | y8    |
|                           | 622.64  | 22.98 | ALQDLENAASGDAAVHQR                       | y7    |
|                           | 623.27  | 23.99 | YYAVVDC[160]DSPETASK                     | y7    |
|                           | 622.3   | 24.05 | FYDVALDTGDK                              | y7    |
|                           | 622.29  | 26.62 | SSGGSGGGVPEQEDSVLFR                      | y9    |
|                           | 622.64  | 26.7  | ENADSLQASLRPHADEL                        | y7    |
|                           | 622.64  | 26.71 | SPDGAHLTWEPPSVTSGK                       | y9    |
|                           | 623.28  | 26.89 | SC[160]DNPYIPNGDYSPLR                    | y8    |
|                           | 622.28  | 27.08 | SAPC[160]TVVQC[160]DLQEMAR               | y9    |
|                           | 622.63  | 27.09 | SHLLNC[160]C[160]PHDVLSGTR               | y9    |
|                           | 623.28  | 27.16 | DNFGGNTAWEEENLSK                         | y7    |
|                           | 622     | 28.42 | RPALNYPVYGETTQVR                         | y8    |
|                           | 623.36  | 28.47 | PPLRPQQNPVLPVAGER                        | y7    |
|                           | 623.62  | 29.02 | MSC[160]FSRPSMSPTPLDR                    | y8    |
| ALGATPNTGPAPQGA           | 661.24  | 9.84  | IEGDEEMHC[160]SD                         | y6    |
|                           | 660.97  | 12.81 | GSSGTGGTATWKPGSSGPGSTGS                  | y10   |
|                           | 661.3   | 14.9  | SPGQHDGTYFGR                             | y6    |
|                           | 661.88  | 17.09 | GLAPQNKPELQK                             | y4    |
| TVSLPVGADEDDIK            | 729.85  | 20.86 | SGHTLTPVESGDMK                           | y8    |
|                           | 729.67  | 22.14 | APEGTSAPGGGPGTLDDSATIC[160]R             | y10   |
|                           | 728.37  | 22.57 | LGHPTLNQGEFK                             | y6    |
|                           | 728.35  | 22.58 | AYSEVDGQVFQGR                            | y6    |
|                           | 728.73  | 22.59 | RPGPAASPTPGPGPAPPAAPAPPR                 | y6    |
|                           | 728.39  | 22.83 | ASAGPQPLLQSC[160]K                       | y6    |
|                           | 729.29  | 23.37 | DYEEVGVDVVEGEGEEEGEE                     | y8    |
|                           | 728.36  | 24.24 | ITIYDQENFQK                              | y6    |
|                           | 729.31  | 25.17 | EEEC[160]HFYAGGQVYPGEASR                 | y8    |
|                           | 728.86  | 25.86 | TPELNLQFHDK                              | y10   |
|                           | 729.3   | 26.1  | EDEEESLNEVGYDDIGGC[160]R                 | y6    |
|                           | 729.86  | 27.06 | VEGDMQVPDLDIK                            | y10   |
|                           | 729.99  | 29.48 | QPAIMPQSYGLEGGSC[160]SYK                 | y10   |
| VVAASELVVGDR              | 607.33  | 21.26 | AAVGQEEIQLR                              | y7 y6 |
|                           | 607.33  | 29.03 | SELQLSVSAGSPHPAIAR                       | y7 y6 |
|                           | 607.33  | 30.26 | LTVIEPAWER                               | y7 y6 |
|                           | 607.26  | 30.54 | FVEGVC[160]PFC[160]GYEEAR                | y7 y6 |
|                           | 607.82  | 21.88 | SPATLSLSPGER                             | y6    |
|                           | 607.96  | 21.94 | VIESGPDQLNDNEYTK                         | y7    |
|                           | 607.61  | 22.95 | PEC[160]HLFYNEQGEAR                      | y8    |
|                           | 607.28  | 23.54 | NSVDELNNNVEAVSQTS                        | y6    |
|                           | 607.29  | 23.82 | SGTLGHGSLDETTYER                         | y7    |
|                           | 606.6   | 24.11 | DESTDSGLSMSSYSVPR                        | y7    |
|                           | 606.61  | 24.79 | DASFHC[160]AAHYSLPEGR                    | y6    |
|                           | 606.96  | 25.21 | ATSYTITGLTENQEYK                         | y8    |
|                           | 607.62  | 25.29 | NAQNNGSNFQLEEISR                         | y8    |
|                           | 607.97  | 26.15 | GGSLLAGGGGFGGSLSGGGGSR                   | y8    |
|                           | 606.61  | 26.33 | VGSDMTSQEFTSC[160]LK                     | y7    |
|                           | 606.65  | 26.63 | NYLAWYQQKPGQPPK                          | y7    |
|                           | 606.63  | 26.68 | TSMC[160]SIQSAPPEPATLK                   | y6    |
|                           | 607.29  | 26.78 | NETLGGTC[160]LNVGC[160]IPSK              | y8    |
|                           | 607.61  | 27.01 | DNC[160]APESIEFPVSEAR                    | y6    |
|                           | 606.62  | 27.3  | TVPIDDSSETLEPVC[160]R                    | y8    |

|                    |        |       |                              |        |
|--------------------|--------|-------|------------------------------|--------|
|                    | 606.97 | 28.02 | ALVDHENVISC[160]PHLGAS       | y8     |
|                    | 606.97 | 28.07 | TQNC[160]FLNSEIHQVTK         | y6     |
|                    | 607.3  | 28.37 | MDRPNGLYPNYLNPR              | y7     |
|                    | 606.86 | 29.11 | QLLAGGIAGAVSR                | y7     |
| GAAGTAAQAAVVR      | 606.84 | 29.79 | LIINTFYSNK                   | y6     |
|                    | 571.57 | 17.22 | FC[160]SEAFEC[160]QNHR       | y7     |
|                    | 571.29 | 17.51 | AVGEEVWHSK                   | y8     |
| EALALALDQER        | 614.96 | 23.02 | PGEEITYSC[160]KPGYVSR        | y7 y5  |
|                    | 614.92 | 25.67 | NIPGDFEC[160]EC[160]PEGYR    | y6 y5  |
|                    | 614.84 | 22.1  | IEGTPLETIQK                  | y6     |
|                    | 614.29 | 24.35 | DLSINSTEK[160]LHVHC[160]R    | y6     |
|                    | 614.3  | 24.71 | LEQENDDLAHELVTSK             | y7     |
|                    | 614.69 | 25.14 | TPQPVTIKPPPPEVSR             | y5     |
|                    | 613.35 | 25.58 | KPGPGEPLVFGK                 | y5     |
|                    | 614.82 | 25.67 | TQMAEVLPSPR                  | y5     |
|                    | 614.33 | 25.7  | HVVPAQVHVNGGALASER           | y6     |
|                    | 614.3  | 26.35 | NVLGHMQGGSPFPDR              | y5     |
|                    | 613.61 | 27.1  | TDDYLDQPC[160]LETVNR         | y6     |
|                    | 613.94 | 27.23 | FPAEDEFDLSAHNNH              | y5     |
|                    | 613.95 | 29.08 | ISENMNLQFENQMNK              | y5     |
|                    | 613.98 | 29.77 | LQHVEDGVLSMQVASAR            | y6     |
|                    | 613.95 | 30.09 | ASMDVENPDYSEEILK             | y7     |
| ASFLDQVHFQPLPPAVVK | 614.66 | 30.71 | HHVLQTAHPSPLSVYR             | y5     |
|                    | 664.98 | 36.42 | MVSDINNAWGC[160]LEQVEK       | y6     |
|                    | 664.33 | 36.8  | QALVFQC[160]VGC[160]GAFHLQR  | y6     |
|                    | 665.04 | 37.19 | QLGTAYVSAATTGAVATALGLK       | y8     |
|                    | 664.34 | 37.21 | AC[160]LDYPVTSVLPPASLC[160]K | y6     |
|                    | 663.35 | 37.37 | SNVNFVTEIFR                  | y5     |
|                    | 663.69 | 37.5  | SGPSGPDNVQSLPLWPLPK          | y5     |
|                    | 663.9  | 37.98 | LLGNVLC[160]VLAR             | y6     |
|                    | 664.01 | 38.02 | WQVVDTGILDHPLEDR             | y5     |
|                    | 665.05 | 38.27 | NVVVTQADQIGPLPSTLIK          | y5     |
|                    | 663.88 | 38.39 | VSIVNHLEFLR                  | y5     |
|                    | 663.35 | 38.96 | EVAFWTNLFAK                  | y5     |
|                    | 665.34 | 39.46 | NTFAEVTGLSPGVYYFK            | y8     |
|                    | 663.69 | 40.11 | VQSSEMGTSLIMQPILR            | y8     |
|                    | 664.9  | 40.13 | SNTIQSIIIR                   | y5     |
|                    | 664.88 | 40.14 | VNIWLGLSAVEK                 | y5     |
|                    | 664.35 | 40.23 | EDPANILQELPAPLLDDK           | y6     |
|                    | 663.91 | 40.43 | TTVILPLAPFVR                 | y5     |
|                    | 664.67 | 41.8  | QETQLLEDYVEAIEGVR            | y6     |
|                    | 664.35 | 44.47 | LMATMFQNLFPSINVHK            | y6     |
| NYTAPGGGQFTLPR     | 665.03 | 45.11 | ELFDVVANPLVNDLIHGK           | y6     |
|                    | 766.86 | 21.2  | MADEAVC[160]VGPAPTSK         | y11 y3 |
|                    | 767.39 | 28.02 | SAGLEEIEQELTSK               | y11 y3 |
|                    | 766.82 | 20.59 | IDDPDTSKPEDWD                | y3     |
|                    | 768.35 | 20.99 | STAPETAIEC[160]TQAPAPASEDEK  | y3     |
|                    | 767.98 | 21.57 | C[160]LTTDEYDGHSTYPSHQYQ     | y9     |
|                    | 768.37 | 21.76 | NYTPQLSEAEVER                | y9     |
|                    | 767.86 | 22.65 | LEDALSSDTSGHFR               | y9     |
|                    | 766.88 | 24.01 | GSLISTDSGNSLPER              | y9     |
|                    | 767.36 | 25.37 | GWEEGVAQMSVGQR               | y3     |
|                    | 767.86 | 25.87 | YVIDYYDGGEVVK                | y9     |
|                    | 767.11 | 26    | KPVAAAAAAPAPAPAPAPAPAKPK     | y11    |
|                    | 767.33 | 26.28 | AFYEC[160]LAAC[160]EGSR      | y11    |
|                    | 767.38 | 26.41 | QVQEAIGISNAQAATSPTDEAK       | y11    |
|                    | 767.4  | 26.83 | QLSQALDTSNMVVK               | y3     |
|                    | 766.91 | 27.47 | HADVGVALLANAPER              | y3     |
|                    | 766.87 | 27.51 | LLEGDAHLSSSQF                | y3     |
|                    | 768.32 | 28.45 | C[160]EC[160]PVGFFYNDK       | y11    |
|                    | 766.9  | 28.77 | HSTFFPALQGAQTK               | y11    |
|                    | 766.9  | 29.27 | SDTLQITDLGVSGAR              | y3     |
|                    | 767.38 | 29.52 | EAQLDEEGQLVR                 | y3     |
| NDPLLNVGK          | 485.24 | 22.33 | YHVVSGADDYTVK                | y7 y6  |
|                    | 484.83 | 26.24 | VLLLTGKPK                    | y6 y5  |
|                    | 484.72 | 17.85 | MPEC[160]YIR                 | y7     |
|                    | 484.74 | 20.59 | LPDGYEFK                     | y6     |
|                    | 484.59 | 20.96 | GNVAYATSTGGIVNK              | y5     |
|                    | 484.25 | 21.89 | VPQFSFSR                     | y6     |
|                    | 484.22 | 23.2  | HNC[160]AVEFNFGQK            | y7     |
|                    | 485.6  | 24.88 | APLHLHENPDLAK                | y6     |
|                    | 484.59 | 25.04 | NTFGSGVTSAVNVAK              | y5     |

|                  |        |       |                                |        |
|------------------|--------|-------|--------------------------------|--------|
|                  | 483.92 | 25.4  | KPPKPQLMANY                    | y5     |
|                  | 485.26 | 25.94 | TELSVSEVHPSR                   | y6     |
| GGYFPVAPNDQYVDLR | 905    | 38.37 | GPHALGAPSLLLTGTQLY             | y12 y7 |
|                  | 906.1  | 28.5  | LVDEPGHC[160]ADFHPSTVVAIGTHSGR | y7     |
|                  | 904.44 | 29.23 | LIHGPNLYC[160]YSDVEK           | y7     |
|                  | 904.97 | 29.41 | GAAQLAELGPPGVGGVGAC[160]K      | y7     |
|                  | 905.79 | 35.26 | TPDTTANAEGDLPTTMGGPLPPHLALK    | y7     |
|                  | 905.14 | 35.53 | ATSTTELPPEYLTSPLSQSQLPPK       | y7     |
|                  | 906.11 | 36.61 | GAELVEGC[160]DGILGDNFRPTQPLSDR | y12    |
|                  | 905.09 | 37.63 | DSVHLTWEPDDDDGGSPLTGYVVEK      | y7     |
| EYAEVQPLK        | 537.28 | 15.99 | IAQSAELADR                     | y7 y3  |
|                  | 537.28 | 17.81 | TLVADVADR                      | y7 y3  |
|                  | 537.78 | 15.35 | TASPHFTVSK                     | y3     |
|                  | 537.28 | 16.53 | EVQLVESGGR                     | y3     |
|                  | 538.28 | 17.09 | ITC[160]SGEALPK                | y3     |
|                  | 538.6  | 17.63 | NQYVPYPHAPGSQR                 | y5     |
|                  | 538.81 | 20.14 | TPASPVVHIR                     | y3     |
|                  | 537.3  | 20.18 | VAEGQTLDLK                     | y3     |
|                  | 537.3  | 20.29 | LTPTHYLTK                      | y3     |
|                  | 537.28 | 21.47 | EVQLVESGGGV                    | y3     |
|                  | 538.78 | 21.92 | YEYVLHPR                       | y7     |
|                  | 537.93 | 22.66 | VASVMQEYTSQGGV                 | y3     |
|                  | 538.79 | 23    | MLQLVEESK                      | y3     |
|                  | 537.31 | 24.09 | FLQVQPVS                       | y3     |
|                  | 538.29 | 24.46 | LLEQTQIIGEQNAR                 | y3     |
|                  | 538.62 | 24.58 | IQDLSQQAQLAAAEK                | y3     |
| LVPGYEAPINLVYSQR | 908.95 | 31.75 | LLELTSSYSPDVSDYK               | y10    |
|                  | 909.97 | 32.09 | FYGPTNFSPIVNHVAR               | y8     |
|                  | 909.77 | 33.77 | SLSRPTTETQFSNMGMEDVPLATSK      | y8     |
| EATWLGDER        | 537.96 | 24.62 | ALLQYADPVSAQHAK                | y6 y5  |
|                  | 538.28 | 17.58 | LAQFEPSQR                      | y5     |
|                  | 537.3  | 20.18 | VAEGQTLDLK                     | y5     |
|                  | 537.58 | 20.23 | FEFHYPNSDQAQK                  | y5     |
|                  | 538.79 | 20.99 | LSC[160]LGASLQK                | y7     |
|                  | 538.27 | 21.32 | FSGSNSGNTATLTISR               | y5     |
|                  | 537.8  | 23.44 | AAMIVNQLSK                     | y5     |
|                  | 537.91 | 24.08 | SFSDADLADGVSGGEGK              | y7     |
|                  | 538.27 | 25.98 | HGNQYIQVNEPWK                  | y5     |
| SEIEEARL         | 472.77 | 19.9  | LTLDIQNK                       | y6 y5  |
|                  | 473.25 | 22.49 | HPLKPDNQFPFQ                   | y6 y4  |
|                  | 473.24 | 22.66 | LAEQELIETSER                   | y5 y4  |
|                  | 472.76 | 14.49 | IVDNLQSR                       | y5     |
|                  | 473.26 | 15.3  | ANGTTVHVGIHPSK                 | y5     |
|                  | 473.25 | 15.6  | SGDTPITVR                      | y4     |
|                  | 472.29 | 17.04 | VPPPPPIAR                      | y4     |
|                  | 473.9  | 17.67 | DAVC[160]SGVTGAANVAK           | y5     |
|                  | 473.88 | 19.1  | PEDVFTENPDEK                   | y4     |
|                  | 472.28 | 20.31 | TVSPALISR                      | y4     |
|                  | 472.93 | 20.33 | LAQAAQSSVATITR                 | y5     |
|                  | 472.9  | 20.5  | FEAEPLPENTNR                   | y6     |
|                  | 473.24 | 21.18 | SPTAPSVFSPTGNR                 | y5     |
|                  | 473.22 | 21.51 | VDESDFHDNLR                    | y5     |
|                  | 473.27 | 22.63 | DIQTLLSR                       | y4     |
|                  | 472.28 | 23.43 | VGADITVLR                      | y4     |
|                  | 473.24 | 23.67 | PSSSPVIFAGGQDR                 | y5     |
|                  | 472.77 | 23.87 | LEVDIDIK                       | y4     |
| GSLVEGGIGGTEAR   | 650.65 | 18.3  | EATPVVHETEPESGSQPR             | y8 y7  |
|                  | 651.8  | 17.51 | ALGADDSYYTAR                   | y8     |
|                  | 650.3  | 18.54 | NPDGGFATYETK                   | y8     |
|                  | 651.31 | 18.82 | SGENSAVLHYGHAGAPNDR            | y7     |
|                  | 650.63 | 22    | AGLGGAGASTGSSGAC[160]GFSYK     | y7     |
|                  | 650.66 | 22.34 | FQPPQVPDQAPAEAPTEK             | y7     |
|                  | 650.97 | 22.92 | VHNPC[160]SDSVC[160]YSVAVTR    | y7     |
|                  | 650.35 | 22.93 | LVLAEAQVGDER                   | y7     |
|                  | 651.66 | 23.49 | ASAEGPLLGPAAAPSGEGAGSK         | y7     |
|                  | 651.33 | 24.04 | EIEIDIEPTDK                    | y9     |
|                  | 650.84 | 24.53 | LLQEALAEER                     | y9     |
|                  | 651.64 | 25.19 | FATDGEYKPC[160]DPQVIR          | y9     |
|                  | 651.83 | 25.47 | NSIGDIIDHYR                    | y7     |
|                  | 651.63 | 26.3  | TMHC[160]HLDAPANASVC[160]R     | y8     |
|                  | 650.62 | 26.42 | EDVEATFPVHQPGNYSC[160]         | y7     |
| TQDVAVLQLR       | 571.98 | 27.76 | STQAATQVVLNVPETR               | y6 y5  |

|                          |         |       |                                  |       |
|--------------------------|---------|-------|----------------------------------|-------|
|                          | 570.59  | 22.79 | LAYNENDNTYYAMK                   | y7    |
|                          | 570.62  | 23.1  | LHAVNAEEC[160]NVLQGR             | y7    |
|                          | 571.94  | 23.89 | FMETTDPSTASSLQAK                 | y5    |
|                          | 571.63  | 24.36 | HLSPYATLTVGDSSHK                 | y5    |
|                          | 570.97  | 25.37 | DQTKPTPLILDEQGR                  | y7    |
|                          | 571.95  | 25.68 | VQPGHC[160]YHLYNGLR              | y5    |
|                          | 570.65  | 25.85 | APQAPLHSVQQHLHGK                 | y5    |
|                          | 570.96  | 26.24 | SESAPTLHPYSPLSPK                 | y5    |
|                          | 570.3   | 26.81 | LQSWLYSSR                        | y5    |
|                          | 571.81  | 26.83 | NVLDGELLNR                       | y5    |
|                          | 571.61  | 27.15 | AGPNTNGSQFFIC[160]TAK            | y6    |
|                          | 571.93  | 27.64 | LC[160]PSGMYTEYIHSR              | y5    |
|                          | 571.31  | 27.71 | IGPALSC[160]GNTVVVKPAE           | y6    |
|                          | 571.35  | 27.77 | ITNNINVLIK                       | y6    |
|                          | 571.26  | 27.85 | DPETLVGYSMVGC[160]QR             | y7    |
|                          | 571.61  | 28.31 | AAHEALGQFC[160]C[160]ALHK        | y5    |
|                          | 571.97  | 28.89 | SAGIQVVGDDLTVTNPK                | y5    |
|                          | 571.27  | 29.38 | DNFVFGQSGAGNNWAK                 | y7    |
|                          | 571.28  | 29.45 | GDVGGTVDDPYATFVK                 | y5    |
|                          | 571.76  | 29.67 | VETNMAFSPF                       | y6    |
|                          | 571.3   | 29.81 | VDIETPNLEGLTGPR                  | y5    |
|                          | 570.61  | 29.86 | NAYEESLEHLETFK                   | y7    |
|                          | 571.85  | 29.96 | TLVGVGASLGLR                     | y7    |
|                          | 571.63  | 30.47 | EAPC[160]VLIYIPDGHTK             | y5    |
|                          | 571.31  | 30.65 | TSGPNQEQVSPLTLK                  | y5    |
|                          | 570.63  | 30.66 | NSLGGFASTQDTTVALK                | y7    |
|                          | 571.94  | 30.68 | ESVNAAFEMTLTEGSK                 | y6    |
| ATIEQLLTIPLAK            | 705.34  | 35.83 | IFPHLC[160]SLC[160]NVEC[160]SHLK | y4    |
|                          | 705.05  | 36.1  | QVQFHQGFGLAVLKPSNK               | y4    |
|                          | 705.35  | 36.36 | VDVGGSEPASLSYLSFEGATK            | y4    |
|                          | 704.89  | 37.27 | EDTLLIGHLER                      | y4    |
|                          | 704.69  | 37.29 | GLELEPGAGLFVAQAGGADPK            | y7    |
|                          | 706.02  | 37.77 | GAALDVHESEPFSSQGPLK              | y4    |
|                          | 705.02  | 38.06 | IWTLEQPPDEAGSAAVC[160]LR         | y8    |
|                          | 705.38  | 38.77 | EAVGAFVVFDIR                     | y4    |
|                          | 705.36  | 39.19 | SVTQGFNFILC[160]VGETGIGK         | y7    |
|                          | 705     | 39.42 | SPPLIGSESAYESFLSADDK             | y8    |
|                          | 706     | 40.24 | LC[160]YGLNMDFVDPAQITMK          | y7    |
|                          | 704.4   | 40.25 | GLAFELVYSPAIK                    | y4    |
|                          | 705.74  | 40.42 | IHQIELIPNDQLVAVISGR              | y8    |
| GLGEAQLGNSSGNFLLPDAQSIQA | 1030.16 | 44.07 | GAVDDDVAEADIISTVEFNHSGELLATGDK   | y12   |
|                          | 1030.2  | 44.87 | HIPDEIFLLTAEQIAQEVSEQHLSQGR      | y13   |
|                          | 1031.05 | 44.92 | HEAGEALGAIGDPEVLEILK             | y12   |
| GISNFHSPSDVIVDASMPAMIR   | 782.05  | 39.98 | AVSQVLSLEEIHALDTC[160]SEK        | y9 y5 |
|                          | 781.9   | 34.44 | MMVC[160]QVGGIEALVR              | y5    |
|                          | 780.41  | 34.45 | TTLTGLDVQDMLPR                   | y5    |
|                          | 781.4   | 34.56 | GNLASYPIDELVDR                   | y5    |
|                          | 781.92  | 35.35 | TMPAFEVSLQALQK                   | y5    |
|                          | 781.72  | 36.51 | GFDGIPDNVDAALPAHSYSGR            | y5    |
|                          | 781.4   | 36.74 | EPQIEPTADLTGITNQLITC[160]K       | y8    |
|                          | 780.71  | 37.62 | HPSAVTAC[160]NLDLENLITDSNR       | y5    |
|                          | 781.92  | 38.64 | NSAASGLFIQAIQSR                  | y5    |
|                          | 781.38  | 38.69 | VESVFETLVEDSAEEEESTLK            | y9    |
|                          | 780.37  | 38.83 | STQFEYAWC[160]LVR                | y5    |
|                          | 781.43  | 39.23 | AYIVQLQIEDLTR                    | y5    |
|                          | 780.47  | 39.73 | AALSPLADLHALVLR                  | y5    |
|                          | 782.06  | 40.04 | NIPPYFVALVPQEEELDDQK             | y8    |
|                          | 781.37  | 40.49 | C[160]ATQGTGLYEGLDWLSNELSK       | y8    |
|                          | 781.4   | 41.09 | ETVVEVPQVTWEDIGGLEDVK            | y9    |
|                          | 781.45  | 42.52 | AVSTLVEVLGGFLK                   | y9    |
|                          | 781.39  | 42.73 | VVQLSDAC[160]DMLGDHIVLDSVR       | y9    |
|                          | 781.4   | 43.04 | NLNPFEVLQIDPEVTDEEIK             | y5    |
| VQFQSGGANSPALYLLDGLR     | 702.36  | 35.46 | C[160]PFAGILENGAVR               | y10   |
|                          | 702.02  | 36.74 | VHVASVNNFPTAAGLASSAAGY           | y7    |
|                          | 702.33  | 37.93 | MYFPDVEFDIK                      | y8    |
|                          | 702.87  | 37.96 | PVEVMPVFPDFK                     | y7    |
|                          | 701.72  | 38.2  | PC[160]PAPPVAGPSVFLFPPKPK        | y10   |
|                          | 703.04  | 38.27 | IGEHTPSALAIMENANVLAR             | y10   |
|                          | 702.37  | 38.46 | SWSPDVFSPLR                      | y10   |
|                          | 702.04  | 39.41 | GGTYMLNKPIEEIIVQNGK              | y8    |
|                          | 701.69  | 39.73 | GEEVAVPPGLVGYVMVTEEK             | y7    |
|                          | 701.71  | 40.34 | HSIELNEPPLVHTAASLFK              | y10   |



|                 |        |       |                        |       |
|-----------------|--------|-------|------------------------|-------|
|                 | 702.03 | 40.74 | ELYERPPHLFAIADAAYK     | y7    |
|                 | 702.01 | 40.96 | FLSGSWSEFSTQPENFLK     | y7    |
|                 | 702.01 | 41.4  | EHAPSIIFMDEIDSIGSSR    | y7    |
|                 | 702.99 | 41.64 | GDVDMSEVEHFMPILMEK     | y8    |
|                 | 702.68 | 41.78 | IMGLDGATYDLEGHPQYLL    | y7    |
|                 | 702.34 | 42.76 | GVGVFGDMAQDTGIPADIWR   | y8    |
|                 | 702.37 | 43.1  | IMWNELETLVR            | y10   |
| IPDEDLAGLR      | 549.6  | 23.8  | HSDFC[160]GSPAPLHPK    | y9 y8 |
|                 | 549.94 | 20.77 | TAEC[160]TQYQQILHR     | y7    |
|                 | 549.28 | 20.83 | LDAGHTVYQVSQAQK        | y9    |
|                 | 549.78 | 21.11 | LHVDPENFK              | y9    |
|                 | 548.94 | 21.45 | VELHSTC[160]QTISVDR    | y7    |
|                 | 548.97 | 22.49 | VINQYQVVKPTAER         | y7    |
|                 | 549.96 | 22.92 | ATNGSGQATSTAELLVK      | y7    |
|                 | 549.78 | 23.23 | LDFVAPATGAH            | y9    |
|                 | 548.6  | 24.07 | LC[160]YVGYNIEQEQQK    | y8    |
|                 | 548.8  | 24.08 | HGESVLVLDK             | y7    |
|                 | 549.63 | 25.15 | TGVAVNKPAEFTVDAK       | y7    |
|                 | 549.83 | 25.21 | PLTLAAVGAASK           | y8    |
|                 | 549.83 | 25.84 | ILAQDVAQLK             | y9    |
|                 | 549.94 | 26.44 | TLPSCG[160]FNTPSIEKP   | y7    |
|                 | 548.95 | 26.47 | PSPAQIMYNGQPITK        | y8    |
|                 | 548.63 | 26.54 | AFAGPSQKPETIELR        | y9    |
|                 | 548.62 | 26.59 | PAPTSDELTSATNIVK       | y7    |
|                 | 548.6  | 27.53 | VNVEVEFAEPEPER         | y8    |
|                 | 549.29 | 28.77 | AVVEPYNSILTTHTT        | y7    |
| TFGFGFGR        | 443.91 | 25.98 | LYVSNLIGHTR            | y6 y5 |
|                 | 443.9  | 22.88 | LLLHYSFQAC[160]K       | y6    |
|                 | 443.89 | 22.94 | YVGVSDDSVGGFR          | y5    |
|                 | 444.23 | 24.4  | NQILNLTTDNAN           | y5    |
|                 | 443.75 | 24.51 | VDAEALLR               | y7    |
|                 | 443.9  | 25.33 | ADLSGVTEEAPLK          | y7    |
|                 | 443.9  | 26.32 | WALSQSNPSALR           | y7    |
|                 | 444.6  | 27.43 | VLHASLQSVLHK           | y5    |
|                 | 444.54 | 27.7  | YSFLHDSQTSF            | y5    |
|                 | 444.91 | 28.95 | APGQLALFSVSDK          | y5    |
|                 | 443.91 | 30.67 | PSPAISVSVSAPAF         | y5    |
|                 | 443.54 | 30.71 | YWEMQPATFR             | y5    |
|                 | 443.56 | 31.11 | HSNLMLEELDK            | y5    |
|                 | 444.25 | 31.58 | PAFEVSLQALQK           | y7    |
|                 | 443.57 | 32.03 | YAALYQPLFDK            | y5    |
| HPDSDIFLDDVTVSR | 571.63 | 29.19 | LAASIAPEIYGHEDVK       | y6    |
|                 | 571.27 | 29.38 | DNFVFGQSGAGNNWAK       | y8    |
|                 | 572.63 | 29.62 | HLNQGTDEDIYLLGK        | y6    |
|                 | 571.31 | 30.57 | GQVPENEANVVITLTK       | y6    |
|                 | 572.64 | 30.7  | LVVDDTC[160]TLVIPQSR   | y8    |
|                 | 571.95 | 31.32 | WLSTHDPNITWSTR         | y6    |
|                 | 571.64 | 32.07 | FTLTGLKPDTTYDIK        | y6    |
|                 | 572.95 | 32.45 | QYATLDVYNPFETR         | y7    |
|                 | 571.65 | 32.83 | DYIVALQHPVTTDIK        | y6    |
|                 | 570.77 | 33.75 | MADFWLTEK              | y6    |
|                 | 571.27 | 33.94 | ELDINTDGAVNFQEF        | y7    |
|                 | 572.64 | 34.3  | GLGLSYLSSHIANVER       | y7    |
|                 | 572.62 | 34.31 | YEAVGSVHQAWAIR         | y6    |
|                 | 571.61 | 34.45 | GAGAFGYFEVTHDITK       | y6    |
|                 | 571.29 | 35.08 | ESAGLIPPELQEW          | y6    |
|                 | 571.28 | 35.5  | HVEDVPAFQALGSLND       | y6    |
|                 | 572.29 | 35.89 | FVDEGSLYGLSIATSR       | y6    |
|                 | 571.3  | 35.95 | WTAPEAINYGFTTIK        | y6    |
|                 | 571.66 | 36.07 | SHHLLGLEAVDRPLR        | y6    |
|                 | 572.29 | 36.09 | LYSNAYLNDLAGC[160]IK   | y6    |
|                 | 571.31 | 36.91 | LFVGGAPPEFQPSPLR       | y6    |
|                 | 571.27 | 37.84 | EFDFAAAYSYLDTAK        | y7    |
|                 | 572.31 | 38.12 | VIEDLSGPYIWWPAR        | y8    |
| FALNAANAR       | 473.25 | 16.5  | LSENVDR                | y6 y5 |
|                 | 474.54 | 16.78 | GEC[160]WC[160]VNPNTGK | y7 y5 |
|                 | 473.89 | 19.72 | STSPESPYTHWK           | y6 y5 |
|                 | 474.58 | 21.32 | IIC[160]DNTGITTVSK     | y6 y5 |
|                 | 474.24 | 12.85 | SAVEDEGLK              | y5    |
|                 | 473.76 | 13.52 | VSGSELVQK              | y6    |
|                 | 472.74 | 14.45 | DNVAEQLR               | y6    |
|                 | 473.92 | 15.55 | GTTVTVSSASPTSPK        | y6    |

|                      |         |       |                                 |         |
|----------------------|---------|-------|---------------------------------|---------|
|                      | 472.76  | 15.86 | EIAENALGK                       | y5      |
|                      | 472.77  | 16    | VSQQILEK                        | y5      |
|                      | 473.24  | 16.08 | QVSVQPNFQQDK                    | y5      |
|                      | 472.76  | 17.48 | GASALQLER                       | y7      |
|                      | 473.9   | 17.67 | DAVC[160]SGVTGAANVAK            | y5      |
|                      | 473.54  | 18.73 | HYDGSYSTFGER                    | y5      |
|                      | 474.23  | 18.79 | GEATVSFDDPPSAK                  | y7      |
|                      | 472.77  | 19.9  | LTLDIQNK                        | y5      |
|                      | 473.88  | 20.12 | AWSDDTSQLGPKD                   | y5      |
|                      | 472.91  | 20.58 | VIDQEMQAIGGQK                   | y5      |
|                      | 473.23  | 20.75 | GILSMANSGPNSNR                  | y5      |
|                      | 473.9   | 21.29 | ETGTLESQLEANK                   | y5      |
|                      | 473.89  | 21.95 | LTSDDSTVYDYAGK                  | y5      |
|                      | 472.92  | 21.98 | LAVANITNADSATR                  | y6      |
|                      | 473.25  | 22.49 | HPLKPDNQPPFQ                    | y6      |
| IPITGNSPK            | 463.55  | 18.31 | ADEASELAC[160]PTPK              | y7 y6   |
|                      | 462.75  | 13.01 | HLAAVEER                        | y6      |
|                      | 463.22  | 13.38 | MYGGHGSHTSVR                    | y6      |
|                      | 462.55  | 15.7  | PWC[160]HTTNSQVR                | y6      |
|                      | 462.89  | 17.93 | NPSDSAVHSPFTK                   | y7      |
|                      | 463.75  | 19.81 | IDVHWTR                         | y8      |
|                      | 463.55  | 21.03 | TTGIVMDSGNGVTH                  | y6      |
| RIPLDVAEGDTVIYSK     | 591.63  | 36.4  | TPPVLDSDGSFFLYSK                | y7 y6   |
|                      | 590.82  | 29.16 | LPEMEPLVPR                      | y6      |
|                      | 591.91  | 30.21 | C[160]ELC[160]DDGYFGDPLGR       | y5      |
|                      | 591.94  | 30.6  | LAYYQAVDLDEC[160]ASR            | y6      |
|                      | 591.62  | 30.66 | TPAVEGLTEAEEEEELR               | y5      |
|                      | 592.6   | 31.04 | DEISFHC[160]YDGYTLR             | y5      |
|                      | 592.63  | 31.13 | NLQNNAEWVYQGAIR                 | y6      |
|                      | 592.29  | 31.33 | NNQFASFIDK                      | y5      |
|                      | 592.29  | 32.17 | QHVVYGPWNLPQSSY                 | y6      |
|                      | 591.96  | 32.33 | QDTYHYLPFSLPHR                  | y5      |
|                      | 592.64  | 32.97 | LSDVTLVPVSC[160]SELEK           | y7      |
|                      | 592.99  | 33.05 | AGVVGPHELHEQLLSAEK              | y7      |
|                      | 592.67  | 33.34 | IHFVSVKPGEEVIPK                 | y6      |
|                      | 591.64  | 33.65 | NLHVFTMNPSSSEGLK                | y6      |
|                      | 592.97  | 33.77 | MSSSDTPLGTVALLQEK               | y5      |
|                      | 591.63  | 37.14 | TTLVC[160]PYLVDTGMR             | y7      |
|                      | 592.01  | 37.78 | HILGLPVGQHIYLSAR                | y5      |
|                      | 591.32  | 38.01 | NLNPVWQTFIPVR                   | y7      |
| ITGNSSADDIATLAGSR    | 823.39  | 24.04 | HGGTGAFAGIDSSSPEVK              | y11 y10 |
|                      | 824.88  | 23.76 | QAETELC[160]AEAEELR             | y9      |
|                      | 823.44  | 26.34 | LQALQADYQALQQR                  | y9      |
|                      | 824.42  | 27.27 | NRPFMGSIQQNIR                   | y9      |
|                      | 824.33  | 28.38 | DGAPFC[160]PEC[160]YFER         | y9      |
|                      | 824.06  | 29.86 | LYHDPNVNGGTELEPVEGNPYR          | y10     |
|                      | 823.46  | 30.18 | SHVVSQHQALLGTIR                 | y9      |
|                      | 824.9   | 32.73 | SPFEVNVGMALGDANK                | y11     |
| EAPYELNITSATYQSAIPPR | 1109.53 | 29.84 | TLAQAMLNNAQPDQYEAPDK            | y11     |
|                      | 1110.57 | 34.14 | YLTAQAPPTSEDLTATNIVK            | y11     |
|                      | 1109.83 | 34.36 | STGSGNTYAYGVMDSGYRPNLSPEEAYDLGR | y13     |
| VQFQSGGNNSPAVYLLDGLR | 711.03  | 32.46 | SDLQRPNPQSPFC[160]VASSLK        | y7      |
|                      | 711.67  | 32.49 | SAYLHPQQFDC[160]EPGVLGSK        | y7      |
|                      | 712.63  | 33.03 | YGGC[160]LGNMNNFETLEEC[160]K    | y7      |
|                      | 712.36  | 35.79 | DDIAQVDYVEPSQNTISLK             | y10     |
|                      | 712.38  | 37.08 | ILHLPTSWDWR                     | y8      |
|                      | 711.35  | 40.53 | C[160]YELC[160]DTYPALLVVPYR     | y7      |
| YVLEELR              | 460.56  | 21.75 | NSVASISTC[160]DGLR              | y5 y4   |
|                      | 460.27  | 26.94 | GQPLGPAGVQVSLR                  | y6 y4   |
|                      | 460.58  | 22.85 | ITLVSSSGTGMGAAK                 | y4      |
|                      | 460.55  | 23.26 | YVDGDLG[160]PDGIR               | y4      |
|                      | 460.56  | 24.14 | LQEGFGC[160]VVTNR               | y4      |
|                      | 461.6   | 24.29 | LLQQGLAQVEAGR                   | y5      |
|                      | 460.87  | 24.62 | ADSGEGDFLAEGGGV                 | y4      |
|                      | 460.57  | 24.66 | HNAEVAAFHLDR                    | y6      |
|                      | 460.58  | 25.14 | PPILEGAVGGNEAR                  | y4      |
|                      | 461.22  | 25.57 | YGVEQVGDMDIR                    | y4      |
|                      | 461.22  | 25.84 | TANQLMNDFAEK                    | y5      |
|                      | 460.58  | 25.92 | SPALTIENEHIR                    | y4      |
|                      | 461.54  | 26.45 | DWHGVPGQVDAAM                   | y4      |
|                      | 459.74  | 26.47 | DMPPAFIK                        | y5      |
|                      | 460.89  | 26.62 | GMAAAGNYAWVNR                   | y4      |

|             |        |       |                       |       |
|-------------|--------|-------|-----------------------|-------|
|             | 460.21 | 27.18 | MLDVMQDHFSSR          | y4    |
|             | 460.23 | 28.66 | PSPEGMSEIYLR          | y4    |
|             | 460.76 | 29.7  | GLFIIDDK              | y5    |
|             | 460.56 | 29.79 | HSNFLGAYDSIR          | y4    |
|             | 460.27 | 29.84 | NVVLQTLLEGHLR         | y4    |
|             | 460.23 | 30.72 | VC[160]C[160]EGMLIQLR | y4    |
|             | 460.58 | 30.93 | NTLYLQMNNLR           | y4    |
| TVGDVVAYIQK | 596    | 23.46 | ELTSTC[160]SPIISKPKPK | y7 y6 |
|             | 595.98 | 25.28 | VMLGETNPADSKPGTIR     | y6 y5 |
|             | 596.28 | 26.58 | WSDQTYPEGTQAIYK       | y7 y5 |
|             | 596.29 | 28.39 | DNPEATQQMNDLIIGK      | y7 y5 |
|             | 596.84 | 28.8  | NMLLVGVHGR            | y6 y5 |
|             | 596.31 | 29.54 | ETTSTTWHIVSQAVAR      | y6 y5 |
|             | 595.96 | 29.97 | GEPGPPDADGPLYLPYK     | y7 y6 |
|             | 596.28 | 20.24 | EAAGEGPALYEDPPDQK     | y7    |
|             | 595.98 | 20.66 | ISPQIQLSGQTEQTQK      | y7    |
|             | 595.94 | 20.95 | GFVPAGESSEAGGENYK     | y7    |
|             | 595.95 | 21.18 | ETKPEPMEEDLPENK       | y7    |
|             | 595.96 | 21.32 | APEAQVSVQPNFQQDK      | y7    |
|             | 596.6  | 21.41 | C[160]GEEQGSDAALHFNPR | y6    |
|             | 596.32 | 21.85 | VEQQNTKPNIIDIPK       | y7    |
|             | 595.34 | 22.12 | QLQLHLPANR            | y7    |
|             | 596.84 | 23.34 | LEANHGLLVAR           | y5    |
|             | 596.8  | 23.38 | DC[160]LTESNLIK       | y7    |
|             | 596.29 | 23.75 | ATHYHLSSQVQEMAGK      | y7    |
|             | 595.32 | 25.16 | MLSVHVVGYGK           | y5    |
|             | 596.97 | 25.32 | TSIHEAMEQQSISISK      | y6    |
|             | 595.93 | 25.34 | VFC[160]VEEEDSESSLQK  | y7    |
|             | 596.28 | 25.91 | FASYGAHGAQFPDAYGK     | y7    |
|             | 596.29 | 26.04 | STSDIPHMLNQVESK       | y7    |
|             | 596.61 | 26.26 | FYQEPNGETPSSLYR       | y7    |
|             | 596.81 | 26.35 | ATAENEFVALK           | y7    |
|             | 596.29 | 26.48 | DPGGITAGSTDEPPMLTK    | y7    |
|             | 595.61 | 26.6  | EVNFQNGIEC[160]GGAYVK | y6    |
|             | 596.81 | 26.62 | TAAENEFVALK           | y7    |
|             | 595.61 | 27.21 | STHSELLEDYYQSGR       | y5    |
|             | 595.82 | 27.67 | MFIVNTNVPR            | y7    |
|             | 595.35 | 27.72 | IVILEYQPSK            | y5    |
|             | 596.31 | 27.73 | SVAGGFVYTYK           | y7    |
|             | 596.33 | 28.62 | LLETHIHNQGLAAIEK      | y7    |
|             | 595.93 | 28.78 | DLYEAIIDSEGHSYMR      | y7    |
|             | 596.95 | 28.86 | AEAAASALADADADLEER    | y5    |
|             | 596.3  | 29.99 | NLGTALYYATQNC[160]LGK | y7    |
|             | 596.94 | 30.02 | C[160]IVTSTYGTANMER   | y6    |
|             | 596.6  | 30.08 | FLC[160]DEGAGISGDYIDR | y7    |
| IALFGNHAPK  | 355.86 | 19.8  | LEAEIATYR             | y6    |
|             | 356.5  | 21.37 | DDNMFQIGK             | y6    |
|             | 355.53 | 23.06 | LNSAIYDR              | y5    |
|             | 356.18 | 23.5  | MHAAFGGTFK            | y4    |
|             | 355.86 | 23.91 | LLESYIDGR             | y6    |
|             | 356.85 | 24.64 | NLASRPYTF             | y4    |
|             | 356.53 | 25.12 | APYIAYLTR             | y6    |
|             | 356.51 | 25.74 | YMIAEDLGR             | y4    |
| DVLAVVSK    | 356.18 | 26.94 | LGC[160]GLLDYR        | y5    |
|             | 415.74 | 18.49 | EVVAVSVAG             | y5 y4 |
|             | 415.19 | 15.3  | TTFEHAHNMR            | y6    |
|             | 415.54 | 16.13 | DALDQAQQVEK           | y5    |
|             | 414.53 | 16.4  | SGMVQTEAQYK           | y5    |
|             | 414.25 | 17.39 | LPNSVLGK              | y5    |
|             | 415.21 | 17.45 | PASGEVEASQLR          | y5    |
|             | 415.89 | 17.67 | APAPQPPSLPDR          | y5    |
|             | 415.25 | 18.14 | GLNISAVR              | y4    |
|             | 415.55 | 18.74 | AEAGQGDVSIK           | y6    |
|             | 415.21 | 19.24 | PAEDLQDLQK            | y5    |
|             | 414.85 | 20.08 | GGQHGGDWSWR           | y4    |
|             | 415.89 | 20.97 | TEQSVALLEQK           | y6    |
|             | 414.88 | 21.12 | EVDIGIPDATGR          | y6    |
|             | 415.23 | 21.49 | LSQLEGVNER            | y6    |
|             | 415.54 | 21.96 | C[160]LEPEGAAELR      | y6    |
|             | 415.22 | 22.23 | YHLTEPGLASR           | y5    |
|             | 415.55 | 22.25 | GNSLPC[160]VLEQK      | y6    |
|             | 414.89 | 22.32 | GQLEALQVDGGR          | y5    |

|                |          |                 |                             |                 |       |
|----------------|----------|-----------------|-----------------------------|-----------------|-------|
| AFDWDQAYR      | 414.54   | 24.9            | DFDPVHGDVIK                 | y4              |       |
|                | 585.64   | 32.58           | VHQSVISSWLSTDBAK            | y6 y5           |       |
|                | 584.8    | 24.31           | QYGENVFLAK                  | y6              |       |
|                | 585.27   | 25.67           | C[160]QGSQAEEYHLYR          | y5              |       |
|                | 585.83   | 25.85           | SNDVLPVITGR                 | y6              |       |
|                | 586.27   | 26.47           | IDFFEDTER                   | y5              |       |
|                | 585.93   | 26.64           | SGSFSDADLADGVSGGEGK         | y5              |       |
|                | 584.96   | 26.91           | SQDEAPGDPIQQLNLK            | y7              |       |
|                | 584.94   | 26.93           | FAAKPHNPGFGMGGPMH           | y5              |       |
|                | 585.3    | 28.1            | LSHEGPGSELPAALYR            | y5              |       |
|                | 585.29   | 29.09           | TPQMPPTTPSSSFFTK            | y5              |       |
|                | 585.33   | 29.51           | LYQLLTQYK                   | y5              |       |
|                | 586.31   | 30.54           | HIVVSC[160]AAGVTISSVEK      | y6              |       |
|                | 585.98   | 31.62           | KPIDYTVLDDVGHGVK            | y5              |       |
|                | 585.94   | 33.18           | ALDVYC[160]PVQWEYGR         | y6              |       |
|                | ITQDLLDR | 487.24          | 19.16                       | LAGVEGSDIPDDGK  | y6 y4 |
|                |          | 485.96          | 21.23                       | IITGKPSGAISGVQK | y6 y5 |
|                |          | 486.6           | 24.96                       | AQQVSQGLDVLTAQ  | y6 y4 |
| 486.25         |          | 17.7            | QQPDELEIQKQ                 | y4              |       |
| 487.25         |          | 18.45           | EEDSANLKPSELK               | y6              |       |
| 486.9          |          | 19.7            | PVEEYANC[160]HLAR           | y5              |       |
| 486.92         |          | 20.61           | IEDEQALGSQQLKQ              | y4              |       |
| 487.28         |          | 20.93           | LDESIVVK                    | y4              |       |
| 486.58         |          | 21.41           | C[160]PAPGPHALVEGR          | y4              |       |
| 487.57         |          | 21.7            | TLTEPC[160]PLASESR          | y6              |       |
| 486.3          |          | 22.27           | TQILVGVNK                   | y4              |       |
| 486.59         |          | 23.33           | PVVISQSEIGDASR              | y5              |       |
| 486.3          |          | 23.79           | VIVVITDGR                   | y6              |       |
| 486.57         |          | 23.88           | PTSETVMYPAYAK               | y4              |       |
| 487.27         |          | 24.39           | EQLSLLDR                    | y4              |       |
| 486.92         |          | 24.56           | QFVTPADVSGNPK               | y6              |       |
| 486.23         |          | 25.19           | NDLGHPFC[160]NNLR           | y4              |       |
| 487.57         |          | 25.29           | HEAFETDFTVHK                | y5              |       |
| 486.28         | 25.8     | SLAPSLDR        | y4                          |                 |       |
| LEENPEAAQALR   | 734.89   | 16.95           | PFSAPKQTSPPSK               | y9              |       |
|                | 735.67   | 21.17           | IHQDSESGDELSSSSTEQIR        | y9              |       |
|                | 735.4    | 22.33           | AADVEQLKPEEIK               | y8              |       |
| LYTSPEDFEK     | 613.63   | 16.88           | AEPSAPGGGGSPGAC[160]PALGTK  | y5              |       |
|                | 613.83   | 21.03           | ILTHVAEMQGGK                | y6              |       |
|                | 613.97   | 21.05           | GIGGGISYQEGSSGAVSTR         | y6              |       |
|                | 614.94   | 21.38           | TGIEQQSDAGYLC[160]ESQK      | y6              |       |
|                | 613.85   | 21.4            | LQIAQLRPSSN                 | y5              |       |
|                | 613.79   | 22.06           | NAAGNFYINDK                 | y7              |       |
|                | 614.82   | 22.63           | YITASTFAQAR                 | y7              |       |
|                | 613.3    | 22.77           | GGTFYVEPAER                 | y7              |       |
|                | 614.99   | 22.87           | LGSRPQPAEAYAEAVQR           | y5              |       |
|                | 614.62   | 23.77           | HNNC[160]MASHLTPAVYAR       | y5              |       |
|                | 614.68   | 24.56           | LTTVC[160]PTVKPQTQGLAK      | y6              |       |
|                | 614.93   | 24.99           | MWDPHNDPNAQGDAFK            | y5              |       |
| TTPSIVAFAR     | 531.91   | 20.89           | FPSGNYPPC[160]JGDNR         | y8 y7           |       |
|                | 531.8    | 27.27           | TVVEALFQR                   | y7 y5           |       |
|                | 531.6    | 28.4            | SAYALGGLGSGIC[160]PNR       | y8 y5           |       |
|                | 530.63   | 21.79           | PASPTPVIVASHTANK            | y7              |       |
|                | 530.92   | 22.07           | GNVEGATQSLAEQMR             | y5              |       |
|                | 531.77   | 22.27           | LSVNSHFMK                   | y7              |       |
|                | 530.91   | 24.23           | IPIDNMTNEMEQR               | y5              |       |
|                | 531.23   | 25.49           | AGYQDMPEYENFK               | y7              |       |
|                | 531.6    | 26.18           | VGNLPHDIDENELK              | y8              |       |
|                | 530.93   | 26.29           | PYQGPDAVPGALDYK             | y7              |       |
|                | 531.26   | 26.48           | QLVDEFQASGGVGER             | y8              |       |
|                | 530.6    | 27.04           | QEIQINTMTQDLR               | y7              |       |
|                | 531.93   | 27.79           | INQLSEENGDLFSK              | y5              |       |
|                | 531.23   | 28.84           | C[160]FGGGGAGSGFGGGYGGGL    | y5              |       |
|                | 531.27   | 29.27           | AIC[160]TGTLQLALDC[160]R    | y5              |       |
| 531.94         | 30.55    | GLGAFVIDSDHLGHR | y8                          |                 |       |
| 531.62         | 30.68    | QLPELPDVELPTNK  | y5                          |                 |       |
| AGANLFELENFVAR | 774.72   | 39.74           | AVPTGDMEDLPC[160]GLVLSSIGYK | y8              |       |
|                | 775.42   | 43.4            | QLEVINAIVDPSGSLDLLTGNR      | y8              |       |
|                | 774.74   | 45.12           | TKPEEAC[160]SFILSADFPALVVK  | y7              |       |
|                | 775.43   | 45.28           | VLGLQDTITAEVVIEDAAEPK       | y7              |       |
| VVFINTGFLDR    | 640.97   | 32.4            | SGPPPSTVSEAEFEDIMK          | y7 y6           |       |
|                | 639.97   | 30.39           | SSIGTGYDLSASTFSPDGR         | y6              |       |

|                      |         |       |                                |     |
|----------------------|---------|-------|--------------------------------|-----|
|                      | 639.85  | 30.89 | LTLEDQATFIK                    | y7  |
|                      | 639.83  | 31.64 | GEIAEAYADLVK                   | y6  |
|                      | 640.97  | 32.26 | NPGYPQSEGLLGEC[160]MIR         | y6  |
|                      | 640.31  | 32.4  | TDGEGALSEPSATVTIEEL            | y6  |
|                      | 639.68  | 32.45 | VNPLGGAVALGHPLGC[160]TGAR      | y6  |
|                      | 640.66  | 32.52 | GEC[160]VPGEQEPEPILIPR         | y6  |
|                      | 639.37  | 33.52 | ATLGPAVRPLPW                   | y8  |
|                      | 639.68  | 33.65 | PSPAISVSVSAPAFYAPQK            | y7  |
|                      | 640.31  | 33.69 | AGAEYVVESTGVFTTMEK             | y7  |
|                      | 640.33  | 33.75 | LLEETGIC[160]VVPGSGFGQR        | y6  |
|                      | 640.34  | 36.01 | MLDYEQAPNIQLSIGVK              | y6  |
|                      | 640.63  | 36.26 | FKPAYNPYTEPSMEVF               | y7  |
|                      | 639.99  | 36.3  | YPQLTGFHSDLHFLDK               | y6  |
|                      | 640.66  | 36.38 | FVLSGANIMC[160]PGLTSPGAK       | y6  |
|                      | 639.35  | 37    | ANLGVFSVFAPR                   | y8  |
|                      | 640.65  | 38.06 | NGMAVAQFLESNPWVEK              | y7  |
|                      | 640     | 38.17 | IGAVPLIQGEYMIPC[160]EK         | y7  |
|                      | 640.34  | 39.2  | FLTAFLVQISAHSDQNK              | y6  |
|                      | 640.02  | 39.44 | EVELLKPIEDVTIYEK               | y7  |
| LQFTATTLGAPFDGASLQGK | 1055.5  | 32.66 | AAFNAQNNGSNFQLEEISR            | y10 |
|                      | 1055.03 | 33.86 | AVGIDLGTTYSC[160]VGVFQHGK      | y10 |
|                      | 1054.48 | 34.75 | YDTYAYVGLTEGSPGDFR             | y12 |
|                      | 1054.84 | 34.76 | TPSTMENDSSNLDPSQAPSLAQPLVFSNSK | y10 |
|                      | 1054.99 | 36.85 | AMDIIHFHSPAFQHPPTEF            | y10 |
|                      | 1054.57 | 37.22 | AEQTILPLVDEALQHTTTK            | y10 |
|                      | 1054.01 | 37.79 | LGQSLDC[160]NAEVYVVPWEK        | y10 |
|                      | 1054.04 | 40.05 | VVGPISGADLHGMPDLR              | y13 |
|                      | 1055.58 | 40.17 | LALHVYQHGLTGFLGQVTR            | y10 |
|                      | 1054.04 | 42.01 | TC[160]YDLLRPDVVLETAWR         | y10 |
| GSVTPAVSQFNAR        | 666.36  | 18.68 | HLGGSQQLLHNK                   | y7  |
|                      | 665.84  | 21.45 | QGPDAVPGALDYK                  | y6  |
|                      | 666.96  | 21.46 | NPC[160]HNGGLC[160]EEISQEVK    | y9  |
|                      | 665.85  | 22.59 | DPLLASGTDGVTGK                 | y7  |
|                      | 666.33  | 22.81 | QIQVFEDEPAR                    | y9  |
|                      | 667.31  | 25.16 | GSDFWVEAGHTK                   | y7  |
|                      | 666.32  | 25.16 | QAHILLDC[160]GEDNVC[160]KPK    | y9  |
|                      | 666     | 25.3  | TRPTTLGSSQFSGSIDER             | y7  |
|                      | 666.98  | 26.6  | ELGGLEGDPSPPEDEGIQK            | y7  |
|                      | 666.97  | 26.97 | DSATMSLDPEEEAEHPIK             | y7  |
|                      | 667.62  | 27.43 | DC[160]GFPDEGEYIVTAGQDK        | y7  |
|                      | 666.3   | 27.7  | YSFLHDSQTSF                    | y7  |
| LVFLTGPK             | 437.55  | 22.82 | C[160]IC[160]SQLSLTTK          | y6  |
|                      | 437.21  | 22.84 | AC[160]YPLGIC[160]AER          | y6  |
|                      | 437.25  | 23.96 | EWAGALVK                       | y5  |
|                      | 436.57  | 24.11 | NGMVLKPHFHK                    | y5  |
|                      | 437.87  | 24.36 | GC[160]SFLPDPYQK               | y6  |
|                      | 437.87  | 24.52 | FSDGDQWTLR                     | y6  |
|                      | 437.9   | 25.87 | GATWVVLGHSER                   | y5  |
|                      | 437.24  | 26.09 | PNLPPETVDSLK                   | y6  |
|                      | 436.86  | 26.09 | TATSEYQTFN                     | y5  |
|                      | 437.76  | 27.77 | LMGLEALK                       | y7  |
|                      | 437.76  | 28.33 | IC[160]LDILK                   | y7  |
|                      | 437.56  | 30.9  | IADFSDPAFISK                   | y6  |
| VQFQGGGPHAVYLLDGLR   | 641.82  | 32.23 | LC[160]PDISFFQR                | y6  |
|                      | 643     | 33.05 | GTIVLASPGWTTTHSISDGK           | y6  |
|                      | 643.31  | 33.64 | TYVGPMTESLFPGYHTK              | y7  |
|                      | 641.68  | 35.19 | LAQHTLQALQSELDLRL              | y6  |
|                      | 642.34  | 35.41 | ILYHGYSLLYVQGNR                | y7  |
|                      | 643     | 35.94 | DLKPENILLDDNMQIR               | y7  |
|                      | 642.02  | 36.35 | LIILLTDGDPTVGETNPR             | y7  |
|                      | 642.67  | 36.6  | SNHSAQDSAVENLLLLSK             | y6  |
|                      | 641.97  | 36.77 | PENFSFPDDLQC[160]VDLK          | y7  |
|                      | 642.35  | 36.86 | GSNLNTALHPALFQNLK              | y7  |
|                      | 642.26  | 37.39 | DNEVDFQEYC[160]VFLSC[160]      | y8  |
|                      | 643.02  | 38.44 | C[160]RPDQLTGLSLLPLSEK         | y6  |
|                      | 641.98  | 39.18 | DMLSELSTMNEQITGR               | y8  |
|                      | 642.66  | 40.48 | DLVLSGDLGSLYAMTQDK             | y7  |
|                      | 642.36  | 41.27 | DIQAVATSLPLTEANLR              | y7  |
|                      | 642.33  | 41.95 | NLSALENYNFELVDGVK              | y7  |
| TVTDQVGR             | 438.23  | 6.99  | SLEAQAEK                       | y6  |
|                      | 438.21  | 11.18 | C[160]SGPGLER                  | y4  |
|                      | 438.57  | 11.74 | PAPTASSQAAVSAR                 | y5  |

|                        |         |       |                                 |        |
|------------------------|---------|-------|---------------------------------|--------|
|                        | 437.23  | 12.4  | YAAVHVHTNAAR                    | y5     |
| NDPTQQIPK              | 519.57  | 8.71  | AGAPAEEGAEAADNQR                | y6     |
|                        | 519.56  | 10.32 | KPSTSDSDSNFEK                   | y6     |
|                        | 519.92  | 14.86 | EQLQTEQDAPAATR                  | y6     |
|                        | 520.55  | 15.93 | MMNGGHYTYSENR                   | y6     |
| DSFGEDYGVTIADGPMAGLLAR | 1126.56 | 38.34 | YYALVC[160]YGPPISTLHDGR         | y8     |
|                        | 1127.56 | 40.28 | GVNWAAFHPTMPLIVSGADDR           | y8     |
|                        | 1128.23 | 43.31 | GNPFGSGLNINILSSLGSSAPSESHPSDFQR | y12    |
| SVFDDGLAFDGSSIR        | 792.07  | 35.58 | IESSTPTVVEGQTLDLNC[160]VVAR     | y10 y9 |
|                        | 791.87  | 29.54 | FAPYIDDLSEEQR                   | y10    |
|                        | 793.34  | 30.87 | DVPNPNQDDDDDEGFSFNPLK           | y8     |
|                        | 793.42  | 31.51 | LQEEHSLQDVIFK                   | y9     |
|                        | 792.4   | 32.51 | C[160]IYLVDSGGAYLPR             | y9     |
|                        | 793.41  | 33.34 | NVLC[160]GNIPDLFAR              | y9     |
|                        | 793.39  | 33.78 | MSEPLQSVVDHMATHLGVSPSR          | y8     |
|                        | 793.72  | 35.48 | DYHMERPLLNQEHLEELGR             | y8     |
|                        | 792.42  | 35.61 | TPIQVESSPQPGLPAGEQLEGLK         | y9     |
|                        | 793.39  | 35.63 | FSALESQEQDTQELLQEENR            | y8     |
|                        | 792.42  | 37.86 | PNVHAAEFVPSFLR                  | y9     |
|                        | 791.9   | 38.38 | GAMGIMLVYDITNGK                 | y10    |
| SEFAYGSFVR             | 581.93  | 28.35 | TEEIFYYDTNTGK                   | y8 y7  |
|                        | 581.96  | 24.22 | NYGILADATEQVGQHK                | y7     |
|                        | 581.98  | 26.2  | LNVFAKPEATEVSPNK                | y7     |
|                        | 581.96  | 26.5  | ATNHMGNVFTIPANR                 | y6     |
|                        | 580.93  | 26.71 | YSLGSSFGSGAGSSFSR               | y7     |
|                        | 581.93  | 27.22 | SFFTASEGC[160]SNPLGGGR          | y6     |
|                        | 581.8   | 28.12 | LEEAVWRPY                       | y6     |
|                        | 581.96  | 28.45 | PYPTFNPSSDVAALHK                | y7     |
|                        | 581.96  | 28.92 | LAGGYENVPTVDIHMK                | y7     |
|                        | 580.33  | 29.83 | VLISTDVWAR                      | y6     |
|                        | 581.28  | 29.9  | QSVFFFSGDK                      | y8     |
|                        | 581.63  | 30.09 | EWGSHAPTFQVQSIR                 | y6     |
|                        | 581.95  | 30.38 | VTGQFLYQDSNWASK                 | y7     |
|                        | 581.63  | 30.96 | TANEGGSLLYEQLGYK                | y6     |
|                        | 581.63  | 31.4  | GEDVPLTEQTVSQVLQ                | y7     |
|                        | 581.95  | 31.41 | AAFGLSEAGFNTAC[160]VTK          | y7     |
|                        | 581.98  | 31.49 | LIIEETKPC[160]VPVSMK            | y7     |
|                        | 581.27  | 32.42 | SAQEMFTYIC[160]NHIK             | y6     |
|                        | 580.64  | 32.69 | VIAPENLPLTPYC[160]R             | y6     |
|                        | 580.64  | 32.81 | MSEALPLGAPDAGAALAGK             | y7     |
|                        | 581.61  | 32.9  | ENLMASDHLDTPMLR                 | y6     |
|                        | 581.96  | 33.35 | EEVGEEAIVELVENGK                | y7     |
|                        | 581.96  | 33.64 | GDEEGVPAVVIDMSGLR               | y6     |
| YYQNAGGTHPTTYK         | 545.27  | 10.55 | GQGSSPVAMQK                     | y7 y5  |
|                        | 545.75  | 9.1   | QDDHGYISR                       | y7     |
|                        | 544.76  | 10.91 | LGPHAGDVEGH                     | y5     |
|                        | 546.58  | 14.29 | QEAVVEEDYNENAK                  | y6     |
| PGLPVEYLQVPSPSMGR      | 608.93  | 32.06 | LEPEDFAVYYC[160]QQY             | y7 y5  |
|                        | 608.98  | 37.03 | HIIVAC[160]JEGSPYVPVHF          | y8 y7  |
|                        | 609.97  | 32.17 | QLDEYSSSVANFLQAR                | y5     |
|                        | 609.31  | 33.35 | MVSISNYPLSAALTC[160]AK          | y5     |
|                        | 608.84  | 33.56 | DLSELLQIQMR                     | y5     |
|                        | 609.64  | 35.43 | YNPLQDEWVLSAHR                  | y7     |
|                        | 608.63  | 36.06 | DPDNELYFAHGLFSAK                | y8     |
|                        | 609.28  | 37    | C[160]GGELVDTLQFVC[160]GDR      | y7     |
|                        | 609.84  | 37.25 | FQDQVLDLLK                      | y7     |
|                        | 608.29  | 37.49 | FNEFMSNILT                      | y5     |
|                        | 607.86  | 37.57 | GSLPITVTWLK                     | y5     |
|                        | 609.33  | 37.65 | NLLYYPQSLNFANR                  | y5     |
|                        | 609.32  | 38.01 | FWYFVSQLK                       | y8     |
|                        | 610     | 38.1  | IANILNSEELDIQDLK                | y7     |
|                        | 609.35  | 39.15 | SKPILDLGAEALIMQAR               | y7     |
|                        | 608.97  | 39.61 | LMQDDEMNFIFNLTK                 | y5     |
|                        | 608.98  | 39.7  | HVEDVPAFQALGSLNDL               | y7     |
|                        | 609.97  | 40.45 | FSQLAEAYEVLSEVK                 | y5     |
|                        | 608.32  | 40.47 | TGIVDISILTTGMSATSR              | y7     |
|                        | 608.62  | 40.62 | LDLMDAGTDAMDVLMGR               | y7     |
|                        | 609.99  | 40.66 | ALTLQDLNIIWAAQAGK               | y7     |
|                        | 608.8   | 40.74 | MMAFFDSLVR                      | y8     |
|                        | 608.95  | 41.08 | SPYEPLNFHAMFQPF                 | y8     |
|                        | 609.01  | 41.79 | LFYLALPPTVYEAVTK                | y5     |
| GVTEETTTGVLR           | 630.84  | 16.69 | GFEKPSAIQQR                     | y6     |

|        |       |                              |    |
|--------|-------|------------------------------|----|
| 630.65 | 18.95 | NPFRPGDSEPPPAPGAQR           | y6 |
| 630.89 | 19.49 | DYHFEC[160]YHC[160]EDC[160]R | y8 |
| 631.29 | 20.22 | TESPATAAETASEELDNR           | y6 |
| 630.32 | 20.3  | EMSGSPASGIPVK                | y7 |
| 631.31 | 22.09 | NRPPFGQGYTQPGPGYR            | y6 |
| 631.82 | 23.36 | DLTDAAI GPAYR                | y7 |
| 631.82 | 25.17 | TIAMDGTEGLVR                 | y8 |
