# Supplementary material for: Detection of Mycobacterium tuberculosis Peptides in the Exosomes of Patients with Active and Latent M. tuberculosis Infection Using MRM-MS
Source: PubMed Central journal article supplement (PMC4117584; doi:10.1371/journal.pone.0103811), 2014-07-31
Supplement: pone.0103811.s006.pdf [file pone.0103811.s006.pdf]

## Supplemental Methods

Patients were sampled from the overall cohort of patients with unexplained cough for  $\geq 2$  weeks, based on the following reference standard definitions for TB outcome classification:

### Confirmed Active TB Diagnosis Categories

All patients diagnosed as TB-positive fit into one of the following categories:

#### 1. Culture-positive pulmonary TB (PTB)

- $\geq 1$  positive sputum or bronchoalveolar lavage (BAL) culture with  $>50$  colony-forming units (CFU) on solid Lowenstein-Jensen media

#### 2. Culture-positive AND smear-or TB nucleic-acid amplification test (NAAT)-positive pulmonary TB

- Culture with  $<50$  CFU but accompanied by either  $\geq 1$  positive direct Ziehl-Nielsen (DZN) or LED fluorescence (FM) smear microscopy, or a positive GeneXpert MTB/RIF results on sputum

#### 3. Not culture-positive but smear-positive and TB NAAT-positive pulmonary TB

- No positive cultures but  $\geq 1$  positive DZN or LED FM smear microscopy and a positive GeneXpert MTB/RIF result on sputum

#### 4. Extra-pulmonary TB

- Fulfills none of the criteria for pulmonary TB, but has  $\geq 1$  of the following:
  - Fine-needle lymph-node aspirate with positive AFB-smear examination
  - Cerebrospinal, pericardial, peritoneal, or pleural fluid with exudative fluid chemistries and/or lymphocyte-predominant cell differential

### Confirmed Non-TB Diagnosis Categories

Fulfills none of the criteria for confirmed active TB above, and

#### 1. Not Active TB

- $\geq 2$  negative *Mtb* cultures; no positive *Mtb* cultures, AFB smears, or GeneXpert results; and showed radiographic and/or clinical improvement by 2 months of follow-up without receiving TB therapy

##### i. Latent TB Infection (LTBI) status:

1. LTBI-positive: Not TB, and a positive T-SPOT result by FDA criteria.
2. LTBI-negative: Not TB, and a negative T-SPOT result by FDA criteria.

**Unknown TB status**

Fulfills none of the criteria for confirmed active TB or confirmed not TB categories; <2 negative *Mtb* cultures
